# Supplementary material
Source: PubMed Central journal article supplement (PMC6407295)
Supplement: zns999191459so1.pdf [file zns999191459so1.pdf]

Figure 1-1

| Figure 1 | panel | animal # | sex | experimental group   | time point                              | total n number | n male/<br>female | mouse strain       |  |
|----------|-------|----------|-----|----------------------|-----------------------------------------|----------------|-------------------|--------------------|--|
| a        |       |          | M   | 1x TBI 50cm          |                                         |                | 36                | Aldh111-eGFP/FVB/N |  |
|          |       |          | M   | 3x TBI 70cm 24 hours |                                         |                | 3                 | Aldh111-eGFP/FVB/N |  |
|          |       |          | M   | 3x Sham 24 hours     |                                         |                | 4                 | Aldh111-eGFP/FVB/N |  |
|          |       |          | M   | 3x TBI 50cm 24 hours |                                         |                | 4                 | Aldh111-eGFP/FVB/N |  |
|          |       |          | M   | 3x Sham 45 min       |                                         |                | 12                | Aldh111-eGFP/FVB/N |  |
|          |       |          | M   | 3x TBI 50cm 45 min   |                                         |                | 32                | Aldh111-eGFP/FVB/N |  |
|          |       |          | M   | 3x TBI 60cm 45 min   |                                         |                | 2                 | Aldh111-eGFP/FVB/N |  |
|          |       |          | M   | 1x TBI 60cm          |                                         |                | 5                 | C57BL/6            |  |
|          |       |          | M   | 1x Sham              |                                         |                | 3                 | C57BL/6            |  |
|          |       |          | M   | 3x TBI 60cm 24 hours |                                         |                | 8                 | C57BL/6            |  |
|          |       |          | M   | 3x Sham 24 hours     |                                         |                | 8                 | C57BL/6            |  |
|          |       |          | M   | 3x Sham 45 min       |                                         |                | 8                 | C57BL/6            |  |
|          |       |          | M   | 3x 50cm 45 min       |                                         |                | 24                | C57BL/6            |  |
|          |       |          | F   | 3x TBI 70cm 24 hours |                                         |                | 4                 | Aldh111-eGFP/FVB/N |  |
|          |       |          | F   | 3x Sham 45 min       |                                         |                | 16                | Aldh111-eGFP/FVB/N |  |
|          |       |          | F   | 3x TBI 50cm 45 min   |                                         |                | 32                | Aldh111-eGFP/FVB/N |  |
|          |       |          | F   | 3x TBI 60cm 45 min   |                                         |                | 3                 | Aldh111-eGFP/FVB/N |  |
|          |       |          | F   | 1x TBI 60cm          |                                         |                | 17                | C57BL/6            |  |
|          |       |          | F   | 1x Sham              |                                         |                | 35                | C57BL/6            |  |
|          |       |          | F   | 3x TBI 60cm 24 hours |                                         |                | 30                | C57BL/6            |  |
|          |       |          | F   | 3x Sham 24 hours     |                                         |                | 13                | C57BL/6            |  |
|          |       |          | F   | 3x Sham 45 min       |                                         |                | 7                 | C57BL/6            |  |
|          |       |          | F   | 3x 50cm 45 min       |                                         |                | 35                | C57BL/6            |  |
|          |       |          | F   | 3x 60cm 45 min       |                                         |                | 6                 | C57BL/6            |  |
|          | b     |          |     |                      | see Figure 1 - Statistics for breakdown |                |                   |                    |  |
|          |       |          |     |                      | see Figure 1 - Statistics for breakdown |                |                   |                    |  |
|          |       |          |     |                      | see Figure 1 - Statistics for breakdown |                |                   |                    |  |
|          | c     |          |     |                      | see Figure 1 - Statistics for breakdown |                |                   |                    |  |
|          |       |          |     |                      | see Figure 1 - Statistics for breakdown |                |                   |                    |  |
|          |       |          |     |                      | see Figure 1 - Statistics for breakdown |                |                   |                    |  |
| e        |       | 1063     | M   | 3x Sham 45min        | 1 day                                   |                |                   | Aldh111-eGFP/FVB/N |  |
|          |       | 1065     | M   | 3x TBI 50cm 45min    | 1dpi                                    |                |                   | Aldh111-eGFP/FVB/N |  |
|          |       | 6034     | M   | 3x TBI 60cm 45min    | 7dpi                                    |                |                   | Aldh111-eGFP/FVB/N |  |
|          |       | 6037     | M   | 3x Sham 45min        | 7 days                                  |                |                   | Aldh111-eGFP/FVB/N |  |

Figure 1 - Statistics

Fig. 1b Kruskal-Wallis test, significant difference for variable injury severity, p<0.0001. N is sample number.

| Dunn's multiple comparisons test           | Mean rank diff. | Significant? | Summary |
|--------------------------------------------|-----------------|--------------|---------|
| 1x Sham vs. 3x Sham 45 min                 | -4.307          | No           | ns      |
| 1x Sham vs. 3x Sham 24 hours               | -33.02          | No           | ns      |
| 1x Sham vs. 1x TBI 50cm                    | -150            | Yes          | ****    |
| 1x Sham vs. 1x TBI 60cm                    | -214.3          | Yes          | ****    |
| 1x Sham vs. 3x TBI 50cm 45min              | -273.3          | Yes          | ****    |
| 1x Sham vs. 3x TBI 60cm 24 hours           | -196.5          | Yes          | ****    |
| 3x Sham 45 min vs. 3x Sham 24 hours        | -28.71          | No           | ns      |
| 3x Sham 45 min vs. 1x TBI 50cm             | -145.7          | Yes          | ****    |
| 3x Sham 45 min vs. 1x TBI 60cm             | -210            | Yes          | ****    |
| 3x Sham 45 min vs. 3x TBI 50cm 45min       | -269            | Yes          | ****    |
| 3x Sham 45 min vs. 3x TBI 60cm 24 hours    | -192.2          | Yes          | ****    |
| 3x Sham 24 hours vs. 1x TBI 50cm           | -116.9          | Yes          | ****    |
| 3x Sham 24 hours vs. 1x TBI 60cm           | -181.3          | Yes          | ****    |
| 3x Sham 24 hours vs. 3x TBI 50cm 45min     | -240.2          | Yes          | ****    |
| 3x Sham 24 hours vs. 3x TBI 60cm 24 hours  | -163.5          | Yes          | ****    |
| 1x TBI 50cm vs. 1x TBI 60cm                | -64.37          | Yes          | *       |
| 1x TBI 50cm vs. 3x TBI 50cm 45min          | -123.3          | Yes          | ****    |
| 1x TBI 50cm vs. 3x TBI 60cm 24 hours       | -46.58          | No           | ns      |
| 1x TBI 60cm vs. 3x TBI 50cm 45min          | -58.92          | No           | ns      |
| 1x TBI 60cm vs. 3x TBI 60cm 24 hours       | 17.79           | No           | ns      |
| 3x TBI 50cm 45min vs. 3x TBI 60cm 24 hours | 76.71           | Yes          | *       |

| Test details                               | Mean 1 | SEM 1  | Mean 2 | SEM 2 | N1  | N2  |
|--------------------------------------------|--------|--------|--------|-------|-----|-----|
| 1x Sham vs. 3x Sham 45 min                 | 17.74  | 0.7598 | 18.76  | 1.666 | 78  | 25  |
| 1x Sham vs. 3x Sham 24 hours               | 17.74  | 0.7598 | 26.65  | 2.474 | 78  | 43  |
| 1x Sham vs. 1x TBI 50cm                    | 17.74  | 0.7598 | 63.44  | 3.816 | 78  | 62  |
| 1x Sham vs. 1x TBI 60cm                    | 17.74  | 0.7598 | 93.15  | 4.104 | 78  | 103 |
| 1x Sham vs. 3x TBI 50cm 45min              | 17.74  | 0.7598 | 146.4  | 9.876 | 78  | 57  |
| 1x Sham vs. 3x TBI 60cm 24 hours           | 17.74  | 0.7598 | 84.32  | 5.42  | 78  | 50  |
| 3x Sham 45 min vs. 3x Sham 24 hours        | 18.76  | 1.666  | 26.65  | 2.474 | 25  | 43  |
| 3x Sham 45 min vs. 1x TBI 50cm             | 18.76  | 1.666  | 63.44  | 3.816 | 25  | 62  |
| 3x Sham 45 min vs. 1x TBI 60cm             | 18.76  | 1.666  | 93.15  | 4.104 | 25  | 103 |
| 3x Sham 45 min vs. 3x TBI 50cm 45min       | 18.76  | 1.666  | 146.4  | 9.876 | 25  | 57  |
| 3x Sham 45 min vs. 3x TBI 60cm 24 hours    | 18.76  | 1.666  | 84.32  | 5.42  | 25  | 50  |
| 3x Sham 24 hours vs. 1x TBI 50cm           | 26.65  | 2.474  | 63.44  | 3.816 | 43  | 62  |
| 3x Sham 24 hours vs. 1x TBI 60cm           | 26.65  | 2.474  | 93.15  | 4.104 | 43  | 103 |
| 3x Sham 24 hours vs. 3x TBI 50cm 45min     | 26.65  | 2.474  | 146.4  | 9.876 | 43  | 57  |
| 3x Sham 24 hours vs. 3x TBI 60cm 24 hours  | 26.65  | 2.474  | 84.32  | 5.42  | 43  | 50  |
| 1x TBI 50cm vs. 1x TBI 60cm                | 63.44  | 3.816  | 93.15  | 4.104 | 62  | 103 |
| 1x TBI 50cm vs. 3x TBI 50cm 45min          | 63.44  | 3.816  | 146.4  | 9.876 | 62  | 57  |
| 1x TBI 50cm vs. 3x TBI 60cm 24 hours       | 63.44  | 3.816  | 84.32  | 5.42  | 62  | 50  |
| 1x TBI 60cm vs. 3x TBI 50cm 45min          | 93.15  | 4.104  | 146.4  | 9.876 | 103 | 57  |
| 1x TBI 60cm vs. 3x TBI 60cm 24 hours       | 93.15  | 4.104  | 84.32  | 5.42  | 103 | 50  |
| 3x TBI 50cm 45min vs. 3x TBI 60cm 24 hours | 146.4  | 9.876  | 84.32  | 5.42  | 57  | 50  |

Fig. 1c Two-way ANOVA, no significant difference for variable genetic background (p=0.1102). N is sample number.

| Sidak's multiple comparisons test | Mean Diff. | 95.00% CI of diff. | Significant? | Summary | Adjusted P Value |
|-----------------------------------|------------|--------------------|--------------|---------|------------------|
| C57BL/6 - FVB/N                   |            |                    |              |         |                  |
| 1x Sham                           | -3.624     | -34.59 to 27.34    | No           | ns      | 0.9972           |
| 3x Sham 45 min                    | -4.99      | -44.85 to 34.87    | No           | ns      | 0.9964           |
| 1x TBI 50cm                       | 19.93      | -5.148 to 45       | No           | ns      | 0.1767           |
| 3x TBI 50cm 45min                 | 28.75      | 1.476 to 56.03     | Yes          | *       | 0.0342           |

  

| Test details         | Mean 1 | SEM 1  | Mean 2 | SEM 2 | Mean Diff. | SE of diff. | N1 | N2  |
|----------------------|--------|--------|--------|-------|------------|-------------|----|-----|
| 1x Sham              | 17.74  | 0.7598 | 18.76  | 1.666 | -1.02      | 1.666       | 78 | 25  |
| 3x Sham 45 min       | 17.74  | 0.7598 | 26.65  | 2.474 | -8.91      | 2.474       | 78 | 43  |
| 1x TBI 50cm          | 17.74  | 0.7598 | 63.44  | 3.816 | 45.70      | 3.816       | 78 | 62  |
| 1x TBI 60cm          | 17.74  | 0.7598 | 93.15  | 4.104 | 75.41      | 4.104       | 78 | 103 |
| 3x TBI 50cm 45min    | 17.74  | 0.7598 | 146.4  | 9.876 | 128.66     | 9.876       | 78 | 57  |
| 3x TBI 60cm 24 hours | 17.74  | 0.7598 | 84.32  | 5.42  | 66.58      | 5.42        | 78 | 50  |

| C57BL/6 (1) - FVB/N (2) |       |        |       |        |        |       |  |    |    |
|-------------------------|-------|--------|-------|--------|--------|-------|--|----|----|
| 1x Sham                 | 21.38 | 1.651  | 25    | 2.821  | -3.624 | 12.38 |  | 85 | 32 |
| 3x Sham 45 min          | 18.76 | 1.666  | 23.75 | 2.282  | -4.99  | 15.93 |  | 25 | 32 |
| 1x TBI 50cm             | 69.88 | 5.177  | 49.95 | 3.187  | 19.93  | 10.02 |  | 65 | 78 |
| 3x TBI 50cm 45min       | 152.7 | 11.572 | 123.9 | 15.246 | 28.75  | 10.9  |  | 58 | 62 |

Fig. 1d Two-way ANOVA, no significant differences for variable sex (p=0.8702). N is sample number.

| Sidak's multiple comparisons test | Mean Diff. | 95.00% CI of diff. | Significant? | Summary | Adjusted P Value |
|-----------------------------------|------------|--------------------|--------------|---------|------------------|
| C57BL/6                           |            |                    |              |         |                  |
| Male - C57BL/6                    |            |                    |              |         |                  |
| Female                            |            |                    |              |         |                  |
| 1x Sham                           | 4.245      | -25.7 to 34.19     | No           | ns      | 0.9998           |
| 3x Sham 45 min                    | 2.9        | -53.44 to 59.24    | No           | ns      | >0.9999          |
| 3x Sham 24 hours                  | 8.421      | -33.58 to 50.43    | No           | ns      | 0.998            |
| 1x TBI 50cm                       | -6.235     | -41.42 to 28.95    | No           | ns      | 0.9991           |
| 1x TBI 60cm                       | -31.47     | -58.45 to -4.485   | Yes          | *       | 0.0124           |
| 3x TBI 50cm 45min                 | 6.912      | -30.13 to 43.96    | No           | ns      | 0.9988           |
| 3x TBI 60cm 24 hours              | 21.43      | -16.5 to 59.35     | No           | ns      | 0.618            |

| Test details         | Mean 1 | SEM 1       | Mean 2 | SEM 2  | Mean Diff. | SE of diff. | N1 | N2 |
|----------------------|--------|-------------|--------|--------|------------|-------------|----|----|
| C57BL/6              |        |             |        |        |            |             |    |    |
| Male (1) - C57BL/6   |        |             |        |        |            |             |    |    |
| Female (2)           |        |             |        |        |            |             |    |    |
| 1x Sham              | 23.52  | 2.908       | 19.28  | 1.581  | 4.245      | 11.11       | 42 | 43 |
| 3x Sham 45 min       | 20.5   | 1.537       | 17.6   | 2.583  | 2.9        | 20.9        | 10 | 15 |
| 3x Sham 24 hours     | 32     | 4.437       | 23.58  | 3.432  | 8.421      | 15.58       | 25 | 19 |
| 1x TBI 50cm          | 66.04  | 6.267       | 72.28  | 7.482  | -6.235     | 13.05       | 25 | 40 |
| 1x TBI 60cm          | 83.36  | 5.976       | 114.8  | 9.348  | -31.47     | 10.01       | 47 | 59 |
| 3x TBI 50cm 45min    | 156.8  | 14.831      | 149.9  | 16.673 | 6.912      | 13.74       | 23 | 35 |
| 3x TBI 60cm 24 hours | 103.9  | 11.12405229 | 82.46  | 9.065  | 21.43      | 14.07       | 27 | 26 |

Figure 2-1

| Figure 2 | panel | animal # | sex                | experimental group | time point       | total n number     | n male/<br>female | mouse strain       |         |
|----------|-------|----------|--------------------|--------------------|------------------|--------------------|-------------------|--------------------|---------|
| a,b      |       | 1063     | M                  | 3xTBI 50cm 45min   | 1dpi             | 3 (rdTBI)          | 3M                | Aldh111-eGFP/FVB/N |         |
|          |       | 1065     | M                  | 3xTBI 50cm 45min   | 1dpi             |                    |                   | Aldh111-eGFP/FVB/N |         |
|          |       | 1069     | M                  | 3xTBI 50cm 45min   | 1dpi             |                    |                   | Aldh111-eGFP/FVB/N |         |
|          |       | 1064     | M                  | 3xSham 1day        | 1 day            | 6 (Sham)           | 3M/3F             | Aldh111-eGFP/FVB/N |         |
|          |       | 6298     | F                  | 3x Sham 24hours    | 7 days           |                    |                   | Aldh111-eGFP/FVB/N |         |
|          |       | 6038     | F                  | 3xSham 45 min      | 7 days           |                    |                   | Aldh111-eGFP/FVB/N |         |
|          |       | 6032     | M                  | 3xSham 45 min      | 7 days           | Aldh111-eGFP/FVB/N |                   |                    |         |
|          |       | 6037     | M                  | 3xSham 45 min      | 7 days           | Aldh111-eGFP/FVB/N |                   |                    |         |
|          |       | 6076     | F                  | 3xSham 45 min      | 7 days           | Aldh111-eGFP/FVB/N |                   |                    |         |
|          |       | 6034     | M                  | 3x TBI 60cm 45min  | 7dpi             | 6 (TBI)            | 2M/4F             | Aldh111-eGFP/FVB/N |         |
|          |       | 6033     | F                  | 3x TBI 60cm 45min  | 7dpi             |                    |                   | Aldh111-eGFP/FVB/N |         |
|          |       | 6039     | F                  | 3x TBI 60cm 45min  | 7dpi             |                    |                   | Aldh111-eGFP/FVB/N |         |
|          |       | 6036     | M                  | 3x TBI 60cm 45min  | 7dpi             | Aldh111-eGFP/FVB/N |                   |                    |         |
|          |       | 6078     | F                  | 3x TBI 60cm 45min  | 7dpi             | Aldh111-eGFP/FVB/N |                   |                    |         |
|          |       | 6084     | F                  | 3x TBI 60cm 45min  | 7dpi             | Aldh111-eGFP/FVB/N |                   |                    |         |
|          |       | 5226     | F                  | 3xSham 24hours     | 14 days          | 5 (Sham)           | 5F                | C57BL/6            |         |
|          |       | 5227     | F                  | 3xSham 24hours     | 14 days          |                    |                   | C57BL/6            |         |
|          |       | 5228     | F                  | 3xSham 24hours     | 14 days          |                    |                   | C57BL/6            |         |
|          |       | 5229     | F                  | 3xSham 24hours     | 14 days          | C57BL/6            |                   |                    |         |
|          |       | 5250     | F                  | 3xSham 24hours     | 14 days          | C57BL/6            |                   |                    |         |
|          |       | 5230     | F                  | 3xTBI 60cm 24hours | 14dpi            | 4 (TBI)            | 4F                | C57BL/6            |         |
|          |       | 5232     | F                  | 3xTBI 60cm 24hours | 14dpi            |                    |                   | C57BL/6            |         |
|          |       | 5236     | F                  | 3xTBI 60cm 24hours | 14dpi            |                    |                   | C57BL/6            |         |
|          |       | 5239     | F                  | 3xTBI 60cm 24hours | 14dpi            | C57BL/6            |                   |                    |         |
|          | c,d   |          | 202                | F                  | 3x Sham 45 min   | 4 hours            | 5 (Sham)          | 5F                 | C57BL/6 |
|          |       |          | 203                | F                  | 3x Sham 45 min   | 4 hours            |                   |                    | C57BL/6 |
|          |       |          | 204                | F                  | 3x Sham 45 min   | 4 hours            |                   |                    | C57BL/6 |
|          |       |          | 205                | F                  | 3x Sham 45 min   | 4 hours            | C57BL/6           |                    |         |
|          |       |          | 206                | F                  | 3x Sham 45 min   | 4 hours            | C57BL/6           |                    |         |
|          |       |          | 66                 | F                  | 3x TBI 50cm 4hpi | 4hpi               | 7 (4hpi)          | 7F                 | C57BL/6 |
|          |       | 62       | F                  | 3x TBI 50cm 4hpi   | 4hpi             | C57BL/6            |                   |                    |         |
|          |       | 72       | F                  | 3x TBI 50cm 4hpi   | 4hpi             | C57BL/6            |                   |                    |         |
|          |       | 68       | F                  | 3x TBI 50cm 4hpi   | 4hpi             | C57BL/6            |                   |                    |         |
|          |       | 70       | F                  | 3x TBI 50cm 4hpi   | 4hpi             | C57BL/6            |                   |                    |         |
|          |       | 763      | F                  | 3x TBI 50cm 4hpi   | 4hpi             | C57BL/6            |                   |                    |         |
|          |       | 765      | F                  | 3x TBI 50cm 4hpi   | 4hpi             | C57BL/6            |                   |                    |         |
|          |       | 234      | F                  | 3x TBI 50cm 7dpi   | 7dpi             | 8 (7dpi)           | 8F                | C57BL/6            |         |
|          |       | 235      | F                  | 3x TBI 50cm 7dpi   | 7dpi             |                    |                   | C57BL/6            |         |
|          |       | 236      | F                  | 3x TBI 50cm 7dpi   | 7dpi             |                    |                   | C57BL/6            |         |
|          |       | 330      | F                  | 3x TBI 50cm 7dpi   | 7dpi             | C57BL/6            |                   |                    |         |
|          |       | 331      | F                  | 3x TBI 50cm 7dpi   | 7dpi             | C57BL/6            |                   |                    |         |
|          |       | 1194     | F                  | 3x TBI 50cm 7dpi   | 7dpi             | C57BL/6            |                   |                    |         |
|          |       | 1192     | F                  | 3x TBI 50cm 7dpi   | 7dpi             | C57BL/6            |                   |                    |         |
|          |       | 180      | F                  | 3x TBI 50cm 7dpi   | 7dpi             | C57BL/6            |                   |                    |         |
|          | 152   | F        | 3x TBI 50cm 14dpi  | 14dpi              | 5 (14 dpi)       | 5F                 | C57BL/6           |                    |         |
|          | 153   | F        | 3x TBI 50cm 14dpi  | 14dpi              |                  |                    | C57BL/6           |                    |         |
|          | 155   | F        | 3x TBI 50cm 14dpi  | 14dpi              |                  |                    | C57BL/6           |                    |         |
|          | 156   | F        | 3x TBI 50cm 14dpi  | 14dpi              | C57BL/6          |                    |                   |                    |         |
|          | 157   | F        | 3x TBI 50cm 14dpi  | 14dpi              | C57BL/6          |                    |                   |                    |         |
| e        |       | 1202     | M                  | 3x Sham 45 min     | 4 hours          | 5 (Sham)           | 5M                | C57BL/6            |         |
|          |       | 1198     | M                  | 3x Sham 45 min     | 4 hours          |                    |                   | C57BL/6            |         |
|          |       | 1030     | M                  | 3x Sham 45 min     | 4 hours          |                    |                   | C57BL/6            |         |
|          |       | 1165     | M                  | 3x Sham 45 min     | 4 hours          | C57BL/6            |                   |                    |         |
|          |       | 1166     | M                  | 3x Sham 45 min     | 4 hours          | C57BL/6            |                   |                    |         |
|          |       | 289      | M                  | 3x TBI 50cm 45 min | 4hpi             | 4 (4hpi)           | 4M                | C57BL/6            |         |
|          |       | 290      | M                  | 3x TBI 50cm 45 min | 4hpi             |                    |                   | C57BL/6            |         |
|          |       | 291      | M                  | 3x TBI 50cm 45 min | 4hpi             |                    |                   | C57BL/6            |         |
|          |       | 292      | M                  | 3x TBI 50cm 45 min | 4hpi             | C57BL/6            |                   |                    |         |
|          |       | 293      | M                  | 3x TBI 50cm 45 min | 3dpi             | 3 (3dpi)           | 3M                | C57BL/6            |         |
|          | 295   | M        | 3x TBI 50cm 45 min | 3dpi               | C57BL/6          |                    |                   |                    |         |
|          | 297   | M        | 3x TBI 50cm 45 min | 3dpi               | C57BL/6          |                    |                   |                    |         |

|     |      |   |                    |         |           |     |         |
|-----|------|---|--------------------|---------|-----------|-----|---------|
|     | 1204 | M | 3x TBI 50cm 45 min | 7dpi    | 16 (7dpi) | 16M | C57BL/6 |
|     | 1179 | M | 3x TBI 50cm 45 min | 7dpi    |           |     | C57BL/6 |
|     | 1190 | M | 3x TBI 50cm 45 min | 7dpi    |           |     | C57BL/6 |
|     | 1205 | M | 3x TBI 50cm 45 min | 7dpi    |           |     | C57BL/6 |
|     | 1191 | M | 3x TBI 50cm 45 min | 7dpi    |           |     | C57BL/6 |
|     | 1284 | M | 3x TBI 50cm 45 min | 7dpi    |           |     | C57BL/6 |
|     | 1285 | M | 3x TBI 50cm 45 min | 7dpi    |           |     | C57BL/6 |
|     | 1287 | M | 3x TBI 50cm 45 min | 7dpi    |           |     | C57BL/6 |
|     | 1279 | M | 3x TBI 50cm 45 min | 7dpi    |           |     | C57BL/6 |
|     | 1275 | M | 3x TBI 50cm 45 min | 7dpi    |           |     | C57BL/6 |
|     | 1288 | M | 3x TBI 50cm 45 min | 7dpi    |           |     | C57BL/6 |
|     | 1286 | M | 3x TBI 50cm 45 min | 7dpi    |           |     | C57BL/6 |
|     | 325  | M | 3x TBI 50cm 45 min | 7dpi    |           |     | C57BL/6 |
|     | 326  | M | 3x TBI 50cm 45 min | 7dpi    |           |     | C57BL/6 |
|     | 327  | M | 3x TBI 50cm 45 min | 7dpi    |           |     | C57BL/6 |
|     | 329  | M | 3x TBI 50cm 45 min | 7dpi    |           |     | C57BL/6 |
|     | 146  | M | 3x TBI 50cm 45 min | 14dpi   | 5 (14dpi) | 5M  | C57BL/6 |
|     | 147  | M | 3x TBI 50cm 45 min | 14dpi   |           |     | C57BL/6 |
|     | 148  | M | 3x TBI 50cm 45 min | 14dpi   |           |     | C57BL/6 |
|     | 149  | M | 3x TBI 50cm 45 min | 14dpi   |           |     | C57BL/6 |
|     | 150  | M | 3x TBI 50cm 45 min | 14dpi   |           |     | C57BL/6 |
| f   | 202  | F | 3x Sham 45 min     | 4 hours | 5 (Sham)  | 5F  | C57BL/6 |
|     | 203  | F | 3x Sham 45 min     | 4 hours |           |     | C57BL/6 |
|     | 204  | F | 3x Sham 45 min     | 4 hours |           |     | C57BL/6 |
|     | 205  | F | 3x Sham 45 min     | 4 hours |           |     | C57BL/6 |
|     | 206  | F | 3x Sham 45 min     | 4 hours |           |     | C57BL/6 |
|     | 234  | F | 3x TBI 50cm 7dpi   | 7dpi    | 8 (7dpi)  | 8F  | C57BL/6 |
|     | 235  | F | 3x TBI 50cm 7dpi   | 7dpi    |           |     | C57BL/6 |
|     | 236  | F | 3x TBI 50cm 7dpi   | 7dpi    |           |     | C57BL/6 |
|     | 330  | F | 3x TBI 50cm 7dpi   | 7dpi    |           |     | C57BL/6 |
|     | 331  | F | 3x TBI 50cm 7dpi   | 7dpi    |           |     | C57BL/6 |
|     | 1194 | F | 3x TBI 50cm 7dpi   | 7dpi    |           |     | C57BL/6 |
|     | 1192 | F | 3x TBI 50cm 7dpi   | 7dpi    |           |     | C57BL/6 |
|     | 180  | F | 3x TBI 50cm 7dpi   | 7dpi    |           |     | C57BL/6 |
|     | 1202 | M | 3x Sham 45 min     | 4 hours | 5 (Sham)  | 5M  | C57BL/6 |
|     | 1198 | M | 3x Sham 45 min     | 4 hours |           |     | C57BL/6 |
|     | 1030 | M | 3x Sham 45 min     | 4 hours |           |     | C57BL/6 |
|     | 1165 | M | 3x Sham 45 min     | 4 hours |           |     | C57BL/6 |
|     | 1166 | M | 3x Sham 45 min     | 4 hours |           |     | C57BL/6 |
|     | 1179 | M | 3x TBI 50cm 7dpi   | 7dpi    | 7 (7dpi)  | 7F  | C57BL/6 |
|     | 1285 | M | 3x TBI 50cm 7dpi   | 7dpi    |           |     | C57BL/6 |
|     | 1287 | M | 3x TBI 50cm 7dpi   | 7dpi    |           |     | C57BL/6 |
|     | 1279 | M | 3x TBI 50cm 7dpi   | 7dpi    |           |     | C57BL/6 |
|     | 326  | M | 3x TBI 50cm 7dpi   | 7dpi    |           |     | C57BL/6 |
|     | 327  | M | 3x TBI 50cm 7dpi   | 7dpi    |           |     | C57BL/6 |
|     | 329  | M | 3x TBI 50cm 7dpi   | 7dpi    |           |     | C57BL/6 |
| g   | 1202 | M | 3x Sham 45 min     | 4 hours | 5 Sham    | 5M  | C57BL/6 |
|     | 1198 | M | 3x Sham 45 min     | 4 hours |           |     | C57BL/6 |
|     | 1030 | M | 3x Sham 45 min     | 4 hours |           |     | C57BL/6 |
|     | 1165 | M | 3x Sham 45 min     | 4 hours |           |     | C57BL/6 |
|     | 1166 | M | 3x Sham 45 min     | 4 hours |           |     | C57BL/6 |
|     | 1204 | M | 3x TBI 50cm 45 min | 7dpi    | 16 (7dpi) | 16M | C57BL/6 |
|     | 1179 | M | 3x TBI 50cm 45 min | 7dpi    |           |     | C57BL/6 |
|     | 1190 | M | 3x TBI 50cm 45 min | 7dpi    |           |     | C57BL/6 |
|     | 1205 | M | 3x TBI 50cm 45 min | 7dpi    |           |     | C57BL/6 |
|     | 1191 | M | 3x TBI 50cm 45 min | 7dpi    |           |     | C57BL/6 |
|     | 1284 | M | 3x TBI 50cm 45 min | 7dpi    |           |     | C57BL/6 |
|     | 1285 | M | 3x TBI 50cm 45 min | 7dpi    |           |     | C57BL/6 |
|     | 1287 | M | 3x TBI 50cm 45 min | 7dpi    |           |     | C57BL/6 |
|     | 1279 | M | 3x TBI 50cm 45 min | 7dpi    |           |     | C57BL/6 |
|     | 1275 | M | 3x TBI 50cm 45 min | 7dpi    |           |     | C57BL/6 |
|     | 1288 | M | 3x TBI 50cm 45 min | 7dpi    |           |     | C57BL/6 |
|     | 1286 | M | 3x TBI 50cm 45 min | 7dpi    |           |     | C57BL/6 |
|     | 325  | M | 3x TBI 50cm 45 min | 7dpi    |           |     | C57BL/6 |
|     | 326  | M | 3x TBI 50cm 45 min | 7dpi    |           |     | C57BL/6 |
|     | 327  | M | 3x TBI 50cm 45 min | 7dpi    |           |     | C57BL/6 |
|     | 329  | M | 3x TBI 50cm 45 min | 7dpi    |           |     | C57BL/6 |
| h,i | 207  | M | 3x Sham 45 min     | 4 hours | 6 (Sham)  | 6M  | C57BL/6 |
|     | 208  | M | 3x Sham 45 min     | 4 hours |           |     | C57BL/6 |
|     | 209  | M | 3x Sham 45 min     | 4 hours |           |     | C57BL/6 |
|     | 210  | M | 3x Sham 45 min     | 4 hours |           |     | C57BL/6 |
|     | 211  | M | 3x Sham 45 min     | 4 hours |           |     | C57BL/6 |
|     | 212  | M | 3x Sham 45 min     | 4 hours |           |     | C57BL/6 |
|     | 289  | M | 3x TBI 50cm 45 min | 4hpi    | 4 (4hpi)  | 4M  | C57BL/6 |
|     | 290  | M | 3x TBI 50cm 45 min | 4hpi    |           |     | C57BL/6 |
|     | 291  | M | 3x TBI 50cm 45 min | 4hpi    |           |     | C57BL/6 |
|     | 292  | M | 3x TBI 50cm 45 min | 4hpi    |           |     | C57BL/6 |
|     | 293  | M | 3x TBI 50cm 45 min | 3dpi    | 3 (3dpi)  | 3M  | C57BL/6 |
|     | 295  | M | 3x TBI 50cm 45 min | 3dpi    |           |     | C57BL/6 |
|     | 296  | M | 3x TBI 50cm 45 min | 3dpi    |           |     | C57BL/6 |
|     | 297  | M | 3x TBI 50cm 45 min | 3dpi    |           |     | C57BL/6 |
|     | 1204 | M | 3x TBI 50cm 45 min | 7dpi    | 12 (7dpi) | 12M | C57BL/6 |
|     | 1179 | M | 3x TBI 50cm 45 min | 7dpi    |           |     | C57BL/6 |
|     | 1190 | M | 3x TBI 50cm 45 min | 7dpi    |           |     | C57BL/6 |
|     | 1205 | M | 3x TBI 50cm 45 min | 7dpi    |           |     | C57BL/6 |
|     | 1191 | M | 3x TBI 50cm 45 min | 7dpi    |           |     | C57BL/6 |
|     | 1284 | M | 3x TBI 50cm 45 min | 7dpi    |           |     | C57BL/6 |
|     | 1285 | M | 3x TBI 50cm 45 min | 7dpi    |           |     | C57BL/6 |
|     | 1287 | M | 3x TBI 50cm 45 min | 7dpi    |           |     | C57BL/6 |
|     | 1279 | M | 3x TBI 50cm 45 min | 7dpi    |           |     | C57BL/6 |
|     | 1275 | M | 3x TBI 50cm 45 min | 7dpi    |           |     | C57BL/6 |
|     | 325  | M | 3x TBI 50cm 45 min | 7dpi    |           |     | C57BL/6 |
|     | 326  | M | 3x TBI 50cm 45 min | 7dpi    |           |     | C57BL/6 |
|     | 146  | M | 3x TBI 50cm 45 min | 14dpi   | 6 (14dpi) | 6M  | C57BL/6 |
|     | 147  | M | 3x TBI 50cm 45 min | 14dpi   |           |     | C57BL/6 |
|     | 148  | M | 3x TBI 50cm 45 min | 14dpi   |           |     | C57BL/6 |

|   |      |   |                    |         |           |     |         |
|---|------|---|--------------------|---------|-----------|-----|---------|
|   | 149  | M | 3x TBI 50cm 45 min | 14dpi   |           |     | C57BL/6 |
|   | 150  | M | 3x TBI 50cm 45 min | 14dpi   |           |     | C57BL/6 |
| j | 202  | F | 3x Sham 45 min     | 4 hours | 5 (Sham)  | 5F  | C57BL/6 |
|   | 203  | F | 3x Sham 45 min     | 4 hours |           |     | C57BL/6 |
|   | 204  | F | 3x Sham 45 min     | 4 hours |           |     | C57BL/6 |
|   | 205  | F | 3x Sham 45 min     | 4 hours |           |     | C57BL/6 |
|   | 206  | F | 3x Sham 45 min     | 4 hours |           |     | C57BL/6 |
|   | 636  | F | 3x TBI 50cm 4hpi   | 4hpi    | 7 (4hpi)  | 7F  | C57BL/6 |
|   | 637  | F | 3x TBI 50cm 4hpi   | 4hpi    |           |     | C57BL/6 |
|   | 638  | F | 3x TBI 50cm 4hpi   | 4hpi    |           |     | C57BL/6 |
|   | 639  | F | 3x TBI 50cm 4hpi   | 4hpi    |           |     | C57BL/6 |
|   | 66   | F | 3x TBI 50cm 4hpi   | 4hpi    |           |     | C57BL/6 |
|   | 62   | F | 3x TBI 50cm 4hpi   | 4hpi    |           |     | C57BL/6 |
|   | 72   | F | 3x TBI 50cm 4hpi   | 4hpi    |           |     | C57BL/6 |
|   | 179  | F | 3x TBI 50cm 7dpi   | 7dpi    | 7 (7dpi)  | 7F  | C57BL/6 |
|   | 180  | F | 3x TBI 50cm 7dpi   | 7dpi    |           |     | C57BL/6 |
|   | 1194 | F | 3x TBI 50cm 7dpi   | 7dpi    |           |     | C57BL/6 |
|   | 1192 | F | 3x TBI 50cm 7dpi   | 7dpi    |           |     | C57BL/6 |
|   | 235  | F | 3x TBI 50cm 7dpi   | 7dpi    |           |     | C57BL/6 |
|   | 236  | F | 3x TBI 50cm 7dpi   | 7dpi    |           |     | C57BL/6 |
|   | 330  | F | 3x TBI 50cm 7dpi   | 7dpi    |           |     | C57BL/6 |
|   | 152  | F | 3x TBI 50cm 14dpi  | 14dpi   | 5 (14dpi) | 5F  | C57BL/6 |
|   | 153  | F | 3x TBI 50cm 14dpi  | 14dpi   |           |     | C57BL/6 |
|   | 155  | F | 3x TBI 50cm 14dpi  | 14dpi   |           |     | C57BL/6 |
|   | 156  | F | 3x TBI 50cm 14dpi  | 14dpi   |           |     | C57BL/6 |
|   | 157  | F | 3x TBI 50cm 14dpi  | 14dpi   |           |     | C57BL/6 |
| k | 202  | F | 3x Sham 45 min     | 4 hours | 5 (Sham)  | 5F  | C57BL/6 |
|   | 203  | F | 3x Sham 45 min     | 4 hours |           |     | C57BL/6 |
|   | 204  | F | 3x Sham 45 min     | 4 hours |           |     | C57BL/6 |
|   | 205  | F | 3x Sham 45 min     | 4 hours |           |     | C57BL/6 |
|   | 206  | F | 3x Sham 45 min     | 4 hours |           |     | C57BL/6 |
|   | 179  | F | 3x TBI 50cm 7dpi   | 7dpi    | 7 (7dpi)  | 7F  | C57BL/6 |
|   | 180  | F | 3x TBI 50cm 7dpi   | 7dpi    |           |     | C57BL/6 |
|   | 1194 | F | 3x TBI 50cm 7dpi   | 7dpi    |           |     | C57BL/6 |
|   | 1192 | F | 3x TBI 50cm 7dpi   | 7dpi    |           |     | C57BL/6 |
|   | 235  | F | 3x TBI 50cm 7dpi   | 7dpi    |           |     | C57BL/6 |
|   | 236  | F | 3x TBI 50cm 7dpi   | 7dpi    |           |     | C57BL/6 |
|   | 330  | F | 3x TBI 50cm 7dpi   | 7dpi    |           |     | C57BL/6 |
|   | 207  | M | 3x Sham 45 min     | 4 hours | 4 (Sham)  | 4M  | C57BL/6 |
|   | 209  | M | 3x Sham 45 min     | 4 hours |           |     | C57BL/6 |
|   | 210  | M | 3x Sham 45 min     | 4 hours |           |     | C57BL/6 |
|   | 211  | M | 3x Sham 45 min     | 4 hours |           |     | C57BL/6 |
|   | 1179 | M | 3x TBI 50cm 45min  | 7dpi    | 8 (7dpi)  | 8M  | C57BL/6 |
|   | 1190 | M | 3x TBI 50cm 45min  | 7dpi    |           |     | C57BL/6 |
|   | 1205 | M | 3x TBI 50cm 45min  | 7dpi    |           |     | C57BL/6 |
|   | 1191 | M | 3x TBI 50cm 45min  | 7dpi    |           |     | C57BL/6 |
|   | 326  | M | 3x TBI 50cm 45min  | 7dpi    |           |     | C57BL/6 |
|   | 327  | M | 3x TBI 50cm 45min  | 7dpi    |           |     | C57BL/6 |
|   | 1287 | M | 3x TBI 50cm 45min  | 7dpi    |           |     | C57BL/6 |
|   | 1285 | M | 3x TBI 50cm 45min  | 7dpi    |           |     | C57BL/6 |
| l | 207  | M | 3x Sham 45 min     | 4 hours | 6 (Sham)  | 6M  | C57BL/6 |
|   | 208  | M | 3x Sham 45 min     | 4 hours |           |     | C57BL/6 |
|   | 209  | M | 3x Sham 45 min     | 4 hours |           |     | C57BL/6 |
|   | 210  | M | 3x Sham 45 min     | 4 hours |           |     | C57BL/6 |
|   | 211  | M | 3x Sham 45 min     | 4 hours |           |     | C57BL/6 |
|   | 212  | M | 3x Sham 45 min     | 4 hours |           |     | C57BL/6 |
|   | 1204 | M | 3x TBI 50cm 45 min | 7dpi    | 12 (7dpi) | 12M | C57BL/6 |
|   | 1179 | M | 3x TBI 50cm 45 min | 7dpi    |           |     | C57BL/6 |
|   | 1190 | M | 3x TBI 50cm 45 min | 7dpi    |           |     | C57BL/6 |
|   | 1205 | M | 3x TBI 50cm 45 min | 7dpi    |           |     | C57BL/6 |
|   | 1191 | M | 3x TBI 50cm 45 min | 7dpi    |           |     | C57BL/6 |
|   | 1284 | M | 3x TBI 50cm 45 min | 7dpi    |           |     | C57BL/6 |
|   | 1285 | M | 3x TBI 50cm 45 min | 7dpi    |           |     | C57BL/6 |
|   | 1287 | M | 3x TBI 50cm 45 min | 7dpi    |           |     | C57BL/6 |
|   | 1279 | M | 3x TBI 50cm 45 min | 7dpi    |           |     | C57BL/6 |
|   | 1275 | M | 3x TBI 50cm 45 min | 7dpi    |           |     | C57BL/6 |
|   | 325  | M | 3x TBI 50cm 45 min | 7dpi    |           |     | C57BL/6 |
|   | 326  | M | 3x TBI 50cm 45 min | 7dpi    |           |     | C57BL/6 |

Figure 2 - Statistics

Fig. 2d Kruskal-Wallis test, significant difference for presence of injury and post-injury timepoint (p=0.0023) N is sample number.

| Dunn's multiple comparisons test | Mean rank diff. | Significant? | Summary | Adjusted P Value |
|----------------------------------|-----------------|--------------|---------|------------------|
| Sham vs. 4hpi                    | -11.29          | Yes          | *       | 0.0192           |
| Sham vs. 7dpi                    | -9.429          | No           | ns      | 0.0683           |
| Sham vs. 14dpi                   | -16.6           | Yes          | ***     | 0.0006           |

| Test details   | Mean 1 | SEM 1  | Mean 2 | SEM 2  | N1 | N2 |
|----------------|--------|--------|--------|--------|----|----|
| Sham vs. 4hpi  | 1.02   | 0.2212 | 3.175  | 0.2858 | 5  | 7  |
| Sham vs. 7dpi  | 1.02   | 0.2212 | 3.009  | 0.2913 | 5  | 7  |
| Sham vs. 14dpi | 1.02   | 0.2212 | 4.834  | 0.8111 | 5  | 5  |

Fig. 2e One-Way ANOVA, significant difference for presence and post-injury timepoint (p=0.0473). N is sample number.

| Dunnnett's multiple comparisons test | Mean Diff. | 95.00% CI of diff. | Significant? | Summary | Adjusted P Value | A-? |
|--------------------------------------|------------|--------------------|--------------|---------|------------------|-----|
| Sham vs. 4hpi                        | -0.2614    | -2.576 to 2.053    | No           | ns      | 0.994            | B   |
| Sham vs. 3dpi                        | -0.6572    | -3.193 to 1.879    | No           | ns      | 0.8913           | C   |
| Sham vs. 7dpi                        | -0.4207    | -2.736 to 1.894    | No           | ns      | 0.9655           | D   |
| Sham vs. 14dpi                       | -2.578     | -4.75 to -0.4067   | Yes          | *       | 0.0179           | E   |

| Test details   | Mean 1 | SEM 1  | Mean 2 | SEM 2  | Mean Diff. | SE of diff. | N1 | N2 |
|----------------|--------|--------|--------|--------|------------|-------------|----|----|
| Sham vs. 4hpi  | 1.236  | 0.1796 | 1.497  | 0.2652 | -0.2614    | 0.8601      | 6  | 4  |
| Sham vs. 3dpi  | 1.236  | 0.1796 | 1.893  | 0.6934 | -0.6572    | 0.9422      | 6  | 3  |
| Sham vs. 7dpi  | 1.236  | 0.1796 | 1.657  | 0.432  | -0.4207    | 0.8601      | 6  | 4  |
| Sham vs. 14dpi | 1.236  | 0.1796 | 3.814  | 1.078  | -2.578     | 0.8069      | 6  | 5  |

Fig. 2f

Kruskal-Wallis test, significant difference for sex and presence of injury (p=0.0056). N is sample number

| Dunn's multiple comparisons test | Mean rank diff. | Significant? | Summary | Adjusted P Value |
|----------------------------------|-----------------|--------------|---------|------------------|
| F/Sham vs. F/7dpi                | -13.38          | Yes          | **      | 0.0057           |
| F/Sham vs. M/Sham'               | -9.6            | No           | ns      | 0.1567           |
| M/Sham' vs. M/7dpi               | -3.971          | No           | ns      | >0.9999          |
| F/7dpi vs. M/7dpi                | -0.1964         | No           | ns      | >0.9999          |

  

| Test details       | Mean 1 | SEM 1  | Mean 2 | SEM 2  | N1 | N2 |
|--------------------|--------|--------|--------|--------|----|----|
| F/Sham vs. F/7dpi  | 0.963  | 0.1566 | 2.333  | 0.2919 | 5  | 8  |
| F/Sham vs. M/Sham' | 0.963  | 0.1566 | 1.908  | 0.2308 | 5  | 5  |
| M/Sham' vs. M/7dpi | 1.908  | 0.2308 | 2.703  | 0.5626 | 5  | 7  |
| F/7dpi vs. M/7dpi  | 2.333  | 0.2919 | 2.703  | 0.5626 | 8  | 7  |

Fig. 2g

Unpaired, two-tailed t-test, significant difference for presence of injury (p=0.0345). N is sample number.

| Column A | Sham | N=5  |
|----------|------|------|
| vs.      | vs.  |      |
| Column B | 7dpi | N=16 |

  

| Mean ± SEM of column A   | 1.068 | ± 0.08346 |
|--------------------------|-------|-----------|
| Mean ± SEM of column B   | 2.178 | ± 0.2667  |
| Difference between means | 1.11  | ± 0.4876  |

Fig. 2i

One-way ANOVA, no significant difference for presence of injury and post-injury timepoint (p=0.4620).

| Dunn's multiple comparisons test | Mean Diff. | 95.00% CI of diff. | Significant? | Summary | Adjusted P Value |
|----------------------------------|------------|--------------------|--------------|---------|------------------|
| Sham vs. 4hpi                    | 0.3108     | -0.3052 to 0.9269  | No           | ns      | 0.4457           |
| Sham vs. 7dpi                    | -0.03215   | -0.6025 to 0.5382  | No           | ns      | 0.9978           |
| Sham vs. 14dpi                   | 0.06529    | -0.5607 to 0.6713  | No           | ns      | 0.9913           |

  

| Test details   | Mean 1 | SEM 1  | Mean 2 | SEM 2  | SE of diff. | N1 | N2 |
|----------------|--------|--------|--------|--------|-------------|----|----|
| Sham vs. 4hpi  | 1.17   | 0.1742 | 0.8588 | 0.1353 | 0.2403      | 5  | 5  |
| Sham vs. 7dpi  | 1.17   | 0.1742 | 1.202  | 0.1448 | 0.2225      | 5  | 7  |
| Sham vs. 14dpi | 1.17   | 0.1742 | 1.114  | 0.193  | 0.2403      | 5  | 5  |

Fig. 2j

Kruskal-Wallis Test, no significance for presence of injury or post-injury timepoint (p=0.5993). N is Sample Number.

| Dunn's multiple comparisons test | Mean rank diff. | Significant? | Summary | Adjusted P Value |
|----------------------------------|-----------------|--------------|---------|------------------|
| Sham vs. 4hpi                    | 3.417           | No           | ns      | >0.9999          |
| Sham vs. 3dpi                    | 2.167           | No           | ns      | >0.9999          |
| Sham vs. 7dpi                    | -3.633          | No           | ns      | >0.9999          |
| Sham vs. 14dpi                   | 0.3667          | No           | ns      | >0.9999          |

  

| Test details   | Mean 1 | SEM 1  | Mean 2 | SEM 2   | N1 | N2 |
|----------------|--------|--------|--------|---------|----|----|
| Sham vs. 4hpi  | 0.9036 | 0.9353 | 0.8295 | 0.1942  | 6  | 4  |
| Sham vs. 3dpi  | 0.9036 | 0.9353 | 0.7323 | 0.02093 | 6  | 3  |
| Sham vs. 7dpi  | 0.9036 | 0.9353 | 1.59   | 0.6477  | 6  | 5  |
| Sham vs. 14dpi | 0.9036 | 0.9353 | 0.9077 | 0.1051  | 6  | 5  |

Fig. 2k

Kruskal-Wallis test, significant difference for sex and presence of injury (p=0.0438). N is sample number.

| Dunn's multiple comparisons test | Mean rank diff. | Significant? | Summary | Adjusted P Value |
|----------------------------------|-----------------|--------------|---------|------------------|
| F/Sham vs. M/Sham'               | 4.25            | No           | ns      | >0.9999          |
| F/Sham vs. F/7dpi                | -7.125          | No           | ns      | 0.2996           |
| M/Sham' vs. M/7dpi               | -9              | No           | ns      | 0.113            |

  

| Test details       | Mean 1 | SEM 1   | Mean 2 | SEM 2  | N1 | N2 |
|--------------------|--------|---------|--------|--------|----|----|
| F/Sham vs. M/Sham' | 0.8856 | 0.08251 | 0.6988 | 0.1191 | 4  | 4  |
| F/Sham vs. F/7dpi  | 0.8856 | 0.08251 | 1.392  | 0.1874 | 4  | 8  |
| M/Sham' vs. M/7dpi | 0.6988 | 0.1191  | 1.187  | 0.1323 | 4  | 8  |

Fig. 2l

Kolmogorov-Smirnov Test, significant difference for presence of injury, (p=0.0005). N is sample number.

| Column A | Sham | N=6  |
|----------|------|------|
| vs.      | vs.  |      |
| Column B | 7dpi | N=13 |

  

| Mean ± SEM of column A   | 0.9908 | ± 0.08951 |
|--------------------------|--------|-----------|
| Mean ± SEM of column B   | 3.121  | ± 0.7228  |
| Difference between means | 2.13   | ± 1.082   |

Figure 3-1

| Figure 3 | panel | animal # | sex               | experimental group  | time point        | total n number | n male/<br>female  | mouse strain              |                    |
|----------|-------|----------|-------------------|---------------------|-------------------|----------------|--------------------|---------------------------|--------------------|
| a        |       | 5250     | F                 | 3xSham 45 min       | 14 days           | 1 (Sham)       | 1F                 | C57/B6                    |                    |
|          |       | 5232     | F                 | 3xTBI 60cm 24 hours | 14dpi             | 1 (14dpi)      | 1F                 | C57/B6                    |                    |
|          |       | 1747     | F                 | 3xSham 45 min       | 7 days            | 1 (Sham)       | 1F                 | Aldh111-eGFP/FVB/N        |                    |
|          |       | 1748     | F                 | 3xTBI 50cm 45 min   | 7dpi              | 1 (7dpi)       | 1F                 | Aldh111-eGFP/FVB/N        |                    |
|          |       | 1713     | F                 | 3xSham 45 min       | 7 days            | 2 (Sham)       | 1M/1F              | mGFAP-Cre Tg/GCamp5 fl/fl |                    |
|          |       | 2513     | M                 | 3xSham 45 min       | 7 days            |                |                    | Aldh111-tdTomato          |                    |
|          |       | 1151     | M                 | 3xTBI 45 min        | 7dpi              | 4 (7dpi)       | 3M/1F              | mGFAP-Cre Tg/GCamp5 fl/fl |                    |
|          |       | 1712     | M                 | 3xTBI 45 min        | 7dpi              |                |                    | mGFAP-Cre Tg/GCamp5 fl/fl |                    |
|          |       | 1364     | F                 | 3xTBI 45 min        | 7dpi              |                |                    | mGFAP-Cre Tg/GCamp5 fl/fl |                    |
|          |       | 2515     | M                 | 3xTBI 45 min        | 7dpi              |                |                    | Aldh111-tdTomato          |                    |
|          | b     |          | 5561              | M                   | 3xTBI 50cm 14dpi  | 14dpi          | 2 (14dpi)          | 2M                        | C57/B6             |
|          |       |          | 5562              | M                   | 3xTBI 50cm 14dpi  | 14dpi          |                    |                           | C57/B6             |
|          | c,d   |          | 1063              | M                   | 3x 45 min Sham    | 1 day          | 3 (Sham)           | 2M/1F                     | Aldh111-eGFP/FVB/N |
|          |       |          | 1649              | M                   | 3x TBI 50cm 45min | 1dpi           | 10 (1dpi)          | 5M/5F                     | Aldh111-eGFP/FVB/N |
|          |       | 1648     | F                 | 3x TBI 50cm 45min   | 1dpi              |                |                    | Aldh111-eGFP/FVB/N        |                    |
|          |       | 1651     | F                 | 3x TBI 50cm 45min   | 1dpi              |                |                    | Aldh111-eGFP/FVB/N        |                    |
|          | 1065  | M        | 3x TBI 50cm 45min | 1dpi                |                   |                | Aldh111-eGFP/FVB/N |                           |                    |

|  |      |   |                   |         |           |       |  |                     |
|--|------|---|-------------------|---------|-----------|-------|--|---------------------|
|  | 1069 | M | 3x TBI 50cm 45min | 1dpi    |           |       |  | Aldh111-eGFP//FVB/N |
|  | 1077 | F | 3x TBI 50cm 45min | 1dpi    |           |       |  | Aldh111-eGFP//FVB/N |
|  | 2493 | M | 3x TBI 50cm 45min | 1dpi    |           |       |  | Aldh111-eGFP//FVB/N |
|  | 2499 | M | 3x TBI 50cm 45min | 1dpi    |           |       |  | Aldh111-eGFP//FVB/N |
|  | 2468 | F | 3x TBI 50cm 45min | 1dpi    |           |       |  | Aldh111-eGFP//FVB/N |
|  | 2318 | F | 3x TBI 50cm 45min | 1dpi    |           |       |  | Aldh111-eGFP//FVB/N |
|  |      |   |                   |         |           |       |  |                     |
|  | 1607 | M | 3x 45 min Sham    | 14 days | 4 (Sham)  | 2M/2F |  | Aldh111-eGFP//FVB/N |
|  | 2321 | F | 3x 45 min Sham    | 14 days |           |       |  | Aldh111-eGFP//FVB/N |
|  | 2359 | M | 3x 45 min Sham    | 14 days |           |       |  | Aldh111-eGFP//FVB/N |
|  | 1460 | F | 3x 45 min Sham    | 14 days |           |       |  | Aldh111-eGFP//FVB/N |
|  |      |   |                   |         |           |       |  |                     |
|  | 1454 | F | 3x TBI 50cm 45min | 14dpi   | 6 (14dpi) | 3M/3F |  | Aldh111-eGFP//FVB/N |
|  | 1606 | F | 3x TBI 50cm 45min | 14dpi   |           |       |  | Aldh111-eGFP//FVB/N |
|  | 1608 | M | 3x TBI 50cm 45min | 14dpi   |           |       |  | Aldh111-eGFP//FVB/N |
|  | 2320 | F | 3x TBI 50cm 45min | 14dpi   |           |       |  | Aldh111-eGFP//FVB/N |
|  | 2361 | M | 3x TBI 50cm 45min | 14dpi   |           |       |  | Aldh111-eGFP//FVB/N |
|  | 2364 | M | 3x TBI 50cm 45min | 14dpi   |           |       |  | Aldh111-eGFP//FVB/N |

Figure 3 - Statistics

Fig. 3c One-way ANOVA, significant difference for post-injury timepoint (p=0.0007), N is sample number

| Tukey's multiple comparisons test | Mean Diff. | 95.00% CI of diff. | Significant? | Summary | Adjusted P Value |
|-----------------------------------|------------|--------------------|--------------|---------|------------------|
| 1dpi Sham vs. 1dpi TBI            | -5.094     | -9.121 to -1.066   | Yes          | *       | 0.0104           |
| 1dpi Sham vs. 14dpi Sham          | -0.9345    | -5.607 to 3.738    | No           | ns      | 0.942            |
| 1dpi Sham vs. 14dpi TBI           | -6.217     | -10.54 to -1.891   | Yes          | **      | 0.0036           |
| 1dpi TBI vs. 14dpi Sham           | 4.159      | 0.5397 to 7.779    | Yes          | *       | 0.0209           |
| 1dpi TBI vs. 14dpi TBI            | -1.124     | -4.283 to 2.036    | No           | ns      | 0.7512           |
| 14dpi Sham vs. 14dpi TBI          | -5.283     | -9.232 to -1.334   | Yes          | **      | 0.0066           |

| Test details             | Mean 1 | SEM 1  | Mean 2 | SEM 2  | Mean Diff. | SE of diff. | N1 | N2 |
|--------------------------|--------|--------|--------|--------|------------|-------------|----|----|
| 1dpi Sham vs. 1dpi TBI   | 0.7295 | 0.1766 | 5.823  | 0.8374 | -5.094     | 1.432       | 3  | 10 |
| 1dpi Sham vs. 14dpi Sham | 0.7295 | 0.1766 | 1.664  | 0.2063 | -0.9345    | 1.662       | 3  | 4  |
| 1dpi Sham vs. 14dpi TBI  | 0.7295 | 0.1766 | 6.947  | 0.9336 | -6.217     | 1.539       | 3  | 6  |
| 1dpi TBI vs. 14dpi Sham  | 5.823  | 0.8374 | 1.664  | 0.2063 | 4.159      | 1.287       | 10 | 4  |
| 1dpi TBI vs. 14dpi TBI   | 5.823  | 0.8374 | 6.947  | 0.9336 | -1.124     | 1.124       | 10 | 6  |
| 14dpi Sham vs. 14dpi TBI | 1.664  | 0.2063 | 6.947  | 0.9336 | -5.283     | 1.405       | 4  | 6  |

Fig. 3d One-way ANOVA, no significant difference for sex and post-injury timepoint (p=0.8494), N is sample number.

| Tukey's multiple comparisons test | Mean Diff. | 95.00% CI of diff. | Significant? | Summary | Adjusted P Value |
|-----------------------------------|------------|--------------------|--------------|---------|------------------|
| Male 1dpi vs. Female 1dpi         | -0.6467    | -5.736 to 4.443    | No           | ns      | 0.9808           |
| Male 1dpi vs. Male 14dpi          | -1.544     | -7.42 to 4.333     | No           | ns      | 0.862            |
| Male 1dpi vs. Female 14dpi        | -1.35      | -7.227 to 4.527    | No           | ns      | 0.9019           |
| Female 1dpi vs. Male 14dpi        | -0.8973    | -6.774 to 4.979    | No           | ns      | 0.9677           |
| Female 1dpi vs. Female 14dpi      | -0.7034    | -6.58 to 5.173     | No           | ns      | 0.9839           |
| Male 14dpi vs. Female 14dpi       | 0.1938     | -6.376 to 6.764    | No           | ns      | 0.9997           |

| Test details                 | Mean 1 | SEM 1   | Mean 2 | SEM 2   | Mean Diff. | SE of diff. | N1 | N2 |
|------------------------------|--------|---------|--------|---------|------------|-------------|----|----|
| Male 1dpi vs. Female 1dpi    | 5.5    | 1.225   | 6.147  | 1.266   | -0.6467    | 1.714       | 5  | 5  |
| Male 1dpi vs. Male 14dpi     | 5.5    | 1.225   | 7.044  | 0.08006 | -1.544     | 1.979       | 5  | 3  |
| Male 1dpi vs. Female 14dpi   | 5.5    | 1.225   | 6.85   | 2.084   | -1.35      | 1.979       | 5  | 3  |
| Female 1dpi vs. Male 14dpi   | 6.147  | 1.266   | 7.044  | 0.08006 | -0.8973    | 1.979       | 5  | 3  |
| Female 1dpi vs. Female 14dpi | 6.147  | 1.266   | 6.85   | 2.084   | -0.7034    | 1.979       | 5  | 3  |
| Male 14dpi vs. Female 14dpi  | 7.044  | 0.08006 | 6.85   | 2.084   | 0.1938     | 2.213       | 3  | 3  |

Figure 4-1

| Figure 4 | panel | animal # | sex | experimental group  | time point | total n number | n male/<br>female | mouse strain        |
|----------|-------|----------|-----|---------------------|------------|----------------|-------------------|---------------------|
|          | a     | 6037     | M   | 3x 45 min Sham      | 7 days     | 1 (Sham)       | 1M                | Aldh111-eGFP//FVB/N |
|          |       | 1087     | F   | 3x TBI 50cm 45min   | 4hpi       | 1 (4hpi)       | 1F                | Aldh111-eGFP//FVB/N |
|          |       | 1077     | F   | 3x TBI 50cm 45min   | 1dpi       | 1 (1dpi)       | 1F                | Aldh111-eGFP//FVB/N |
|          |       | 747      | F   | 3x TBI 50cm 45min   | 3dpi       | 1 (3dpi)       | 1F                | Aldh111-eGFP//FVB/N |
|          |       | 6033     | F   | 3x TBI 50cm 45min   | 7dpi       | 1 (7dpi)       | 1F                | Aldh111-eGFP//FVB/N |
|          |       | 30       | M   | 3x TBI 50cm 45min   | 28dpi      | 1 (28dpi)      | 1M                | Aldh111-eGFP//FVB/N |
|          |       | 794      | M   | 3x TBI 50cm 45min   | 56dpi      | 1 (56dpi)      | 1M                | Aldh111-eGFP//FVB/N |
|          | b     | 1093     | M   | 3x TBI 50cm 45min   | 4hpi       | 3 (4hpi)       | 1M/2F             | Aldh111-eGFP//FVB/N |
|          |       | 1087     | F   | 3x TBI 50cm 45min   | 4hpi       |                |                   | Aldh111-eGFP//FVB/N |
|          |       | 1086     | F   | 3x TBI 50cm 45min   | 4hpi       |                |                   | Aldh111-eGFP//FVB/N |
|          |       | 743      | F   | 3x TBI 50cm 45min   | 3dpi       | 3 (3dpi)       | 3F                | Aldh111-eGFP//FVB/N |
|          |       | 747      | F   | 3x TBI 50cm 45min   | 3dpi       |                |                   | Aldh111-eGFP//FVB/N |
|          |       | 749      | F   | 3x TBI 50cm 45min   | 3dpi       |                |                   | Aldh111-eGFP//FVB/N |
|          |       | 35       | M   | 3x TBI 50cm 45min   | 28dpi      | 3 (28dpi)      | 3M                | Aldh111-eGFP//FVB/N |
|          |       | 30       | M   | 3x TBI 50cm 45min   | 28dpi      |                |                   | Aldh111-eGFP//FVB/N |
|          |       | 29       | M   | 3x TBI 50cm 45min   | 28dpi      |                |                   | Aldh111-eGFP//FVB/N |
|          | c     | 1411     | M   | 3x 45 min Sham      | 0-50 days  | 2 (Sham)       | 2M                | Aldh111-eGFP//FVB/N |
|          |       | 1973     | M   | 3x 45 min Sham      | 0-3 days   |                |                   | Aldh111-eGFP//FVB/N |
|          |       | 1453     | F   | 3x TBI 50 cm 45 min | 0-27dpi    | 4 (rdTBI)      | 3M/1F             | Aldh111-eGFP//FVB/N |
|          |       | 1414     | M   | 3x TBI 50 cm 45 min | 0-8dpi     |                |                   | Aldh111-eGFP//FVB/N |
|          |       | 1971     | M   | 3x TBI 50 cm 45 min | 0-3dpi     |                |                   | Aldh111-eGFP//FVB/N |
|          |       | 1974     | M   | 3x TBI 50 cm 45 min | 0-3dpi     |                |                   | Aldh111-eGFP//FVB/N |
|          | d     | 1713     | F   | 3x 45 min Sham      | 7 days     | 2 (Sham)       | 2F                | GCaMP5G//mGFAP Cre  |
|          |       | 1572     | F   | 3x 45 min Sham      | 7 days     |                |                   | GCaMP5G//mGFAP Cre  |
|          |       | 1714     | M   | 3x TBI 50cm 45min   | 7dpi       | 4 (7dpi)       | 2M                | GCaMP5G//mGFAP Cre  |
|          |       | 1151     | M   | 3x TBI 50cm 45min   | 7dpi       |                |                   | GCaMP5G//mGFAP Cre  |
|          |       | 1565     | F   | 3x TBI 50cm 45min   | 7dpi       |                |                   | GCaMP5G//mGFAP Cre  |
|          |       | 1712     | F   | 3x TBI 50cm 45min   | 7dpi       |                |                   | GCaMP5G//mGFAP Cre  |
|          |       | 1713     | F   | 3x 45 min Sham      | 7 days     | 2 (Sham)       | 2F                | GCaMP5G//mGFAP Cre  |
|          |       | 1572     | F   | 3x 45 min Sham      | 7 days     |                |                   | GCaMP5G//mGFAP Cre  |
|          |       | 1714     | M   | 3x TBI 50cm 45min   | 7dpi       | 4 (7dpi)       | 2M/2F             | GCaMP5G//mGFAP Cre  |
|          |       | 1151     | M   | 3x TBI 50cm 45min   | 7dpi       |                |                   | GCaMP5G//mGFAP Cre  |
|          |       | 1565     | F   | 3x TBI 50cm 45min   | 7dpi       |                |                   | GCaMP5G//mGFAP Cre  |
|          |       | 1712     | F   | 3x TBI 50cm 45min   | 7dpi       |                |                   | GCaMP5G//mGFAP Cre  |
|          |       | 2506     | F   | 3x TBI 50cm 45min   | 7dpi       | 3 (7dpi)       | 1M/2F             | Aldh111-tdTomato    |
|          |       | 2515     | M   | 3x TBI 50cm 45min   | 7dpi       |                |                   | Aldh111-tdTomato    |
|          |       | 2512     | F   | 3x TBI 50cm 45min   | 7dpi       |                |                   | Aldh111-tdTomato    |
|          |       | 2514     | M   | 3x 45 min Sham      | 7 days     | 2 (Sham)       | 2M                | Aldh111-tdTomato    |
|          |       | 2516     | M   | 3x 45 min Sham      | 7 days     |                |                   | Aldh111-tdTomato    |

**Figure 4 - Statistics**

Fig. 4b Two-Way ANOVA, significant difference in location examined (p<0.0001). N is sample number.

| Sidak's multiple comparisons test                      | Mean Diff. | 95.00% CI of diff. | Significant? | Summary | Adjusted P Value |
|--------------------------------------------------------|------------|--------------------|--------------|---------|------------------|
| periphery:4hpi vs. periphery:3dpi                      | -5.836     | -51.71 to 40.04    | No           | ns      | >0.9999          |
| periphery:4hpi vs. periphery:28dpi                     | -19.94     | -65.82 to 25.94    | No           | ns      | 0.9551           |
| periphery:4hpi vs. atypical astrocytes:4hpi            | 57.68      | 11.8 to 103.6      | Yes          | **      | 0.0049           |
| periphery:4hpi vs. atypical astrocytes:3dpi            | 70.59      | 24.72 to 116.5     | Yes          | ***     | 0.0003           |
| periphery:4hpi vs. atypical astrocytes:28dpi           | 79.07      | 33.19 to 124.9     | Yes          | ****    | <0.0001          |
| periphery:3dpi vs. periphery:28dpi                     | -14.1      | -59.98 to 31.77    | No           | ns      | 0.9984           |
| periphery:3dpi vs. atypical astrocytes:4hpi            | 63.52      | 17.64 to 109.4     | Yes          | **      | 0.0014           |
| periphery:3dpi vs. atypical astrocytes:3dpi            | 76.43      | 30.55 to 122.3     | Yes          | ****    | <0.0001          |
| periphery:3dpi vs. atypical astrocytes:28dpi           | 84.9       | 39.03 to 130.8     | Yes          | ****    | <0.0001          |
| periphery:28dpi vs. atypical astrocytes:4hpi           | 77.62      | 31.74 to 123.5     | Yes          | ****    | <0.0001          |
| periphery:28dpi vs. atypical astrocytes:3dpi           | 90.53      | 44.66 to 136.4     | Yes          | ****    | <0.0001          |
| periphery:28dpi vs. atypical astrocytes:28dpi          | 99.01      | 53.13 to 144.9     | Yes          | ****    | <0.0001          |
| atypical astrocytes:4hpi vs. atypical astrocytes:3dpi  | 12.91      | -32.96 to 58.79    | No           | ns      | 0.9994           |
| atypical astrocytes:4hpi vs. atypical astrocytes:28dpi | 21.39      | -24.49 to 67.26    | No           | ns      | 0.9235           |
| atypical astrocytes:3dpi vs. atypical astrocytes:28dpi | 8.472      | -37.4 to 54.35     | No           | ns      | >0.9999          |

| Test details                                           | Mean 1 | SEM 1  | Mean 2 | SEM 2  | Mean Diff. | SE of diff. | N1 | N2 |
|--------------------------------------------------------|--------|--------|--------|--------|------------|-------------|----|----|
| periphery:4hpi vs. periphery:3dpi                      | 139.4  | 13.618 | 145.2  | 11.385 | -5.836     | 14.89       | 9  | 9  |
| periphery:4hpi vs. periphery:28dpi                     | 139.4  | 13.618 | 159.3  | 12.258 | -19.94     | 14.89       | 9  | 9  |
| periphery:4hpi vs. atypical astrocytes:4hpi            | 139.4  | 13.618 | 81.69  | 9.281  | 57.68      | 14.89       | 9  | 9  |
| periphery:4hpi vs. atypical astrocytes:3dpi            | 139.4  | 13.618 | 68.77  | 9.542  | 70.59      | 14.89       | 9  | 9  |
| periphery:4hpi vs. atypical astrocytes:28dpi           | 139.4  | 13.618 | 60.3   | 4.77   | 79.07      | 14.89       | 9  | 9  |
| periphery:3dpi vs. periphery:28dpi                     | 145.2  | 11.385 | 159.3  | 12.258 | -14.1      | 14.89       | 9  | 9  |
| periphery:3dpi vs. atypical astrocytes:4hpi            | 145.2  | 11.385 | 81.69  | 9.281  | 63.52      | 14.89       | 9  | 9  |
| periphery:3dpi vs. atypical astrocytes:3dpi            | 145.2  | 11.385 | 68.77  | 9.542  | 76.43      | 14.89       | 9  | 9  |
| periphery:3dpi vs. atypical astrocytes:28dpi           | 145.2  | 11.385 | 60.3   | 4.77   | 84.9       | 14.89       | 9  | 9  |
| periphery:28dpi vs. atypical astrocytes:4hpi           | 159.3  | 12.258 | 81.69  | 9.281  | 77.62      | 14.89       | 9  | 9  |
| periphery:28dpi vs. atypical astrocytes:3dpi           | 159.3  | 12.258 | 68.77  | 9.542  | 90.53      | 14.89       | 9  | 9  |
| periphery:28dpi vs. atypical astrocytes:28dpi          | 159.3  | 12.258 | 60.3   | 4.77   | 99.01      | 14.89       | 9  | 9  |
| atypical astrocytes:4hpi vs. atypical astrocytes:3dpi  | 81.69  | 9.281  | 68.77  | 9.542  | 12.91      | 14.89       | 9  | 9  |
| atypical astrocytes:4hpi vs. atypical astrocytes:28dpi | 81.69  | 9.281  | 60.3   | 4.77   | 21.39      | 14.89       | 9  | 9  |
| atypical astrocytes:3dpi vs. atypical astrocytes:28dpi | 68.77  | 9.542  | 60.3   | 4.77   | 8.472      | 14.89       | 9  | 9  |

Figure 5-1

| Figure 5 | panel | animal #    | sex | experimental group | time point | total n number | n male/ female | mouse strain     |
|----------|-------|-------------|-----|--------------------|------------|----------------|----------------|------------------|
|          |       | 3410 cell 4 | M   | 3x TBI 45 min      | 15dpi      | 18(TBI)        | 18M            | Aldh111-tdTomato |
|          |       | 3421 cell 1 | M   | 3x TBI 45 min      | 13dpi      |                |                | Aldh111-tdTomato |
|          |       | 3928 cell 5 | M   | 3x TBI 45 min      | 7dpi       |                |                | Aldh111-tdTomato |
|          |       | 3932 cell 2 | M   | 3x TBI 45 min      | 11dpi      |                |                | Aldh111-tdTomato |
|          |       | 3934 cell 1 | M   | 3x TBI 45 min      | 13dpi      |                |                | Aldh111-tdTomato |
|          |       | 4281 cell 2 | M   | 3x TBI 45 min      | 14dpi      |                |                | Aldh111-tdTomato |
|          |       | 3619 cell 1 | M   | 3x TBI 45 min      | 12dpi      |                |                | Aldh111-tdTomato |
|          |       | 3619 cell 5 | M   | 3x TBI 45 min      | 12dpi      |                |                | Aldh111-tdTomato |
|          |       | 3928 cell 4 | M   | 3x TBI 45 min      | 7dpi       |                |                | Aldh111-tdTomato |
|          |       | 3932 cell 5 | M   | 3x TBI 45 min      | 11dpi      |                |                | Aldh111-tdTomato |
|          |       | 3932 cell 1 | M   | 3x TBI 45 min      | 11dpi      |                |                | Aldh111-tdTomato |
|          |       | 3932 cell 6 | M   | 3x TBI 45 min      | 11dpi      |                |                | Aldh111-tdTomato |
|          |       | 3934 cell 3 | M   | 3x TBI 45 min      | 13dpi      |                |                | Aldh111-tdTomato |
|          |       | 3934 cell 4 | M   | 3x TBI 45 min      | 13dpi      |                |                | Aldh111-tdTomato |
|          |       | 4199 cell 1 | M   | 3x TBI 45 min      | 7dpi       |                |                | Aldh111-tdTomato |
|          |       | 4199 cell 5 | M   | 3x TBI 45 min      | 7dpi       |                |                | Aldh111-tdTomato |
|          |       | 4199 cell 6 | M   | 3x TBI 45 min      | 7dpi       |                |                | Aldh111-tdTomato |
|          |       | 4281 cell 1 | M   | 3x TBI 45 min      | 14dpi      |                |                | Aldh111-tdTomato |

Figure 5 - Statistics

Fig. 5 Paired Sample T-Test, significant difference between healthy and dysfunctional areas (p<0.0001). N is sample number.

|                         | N  | Mean  | Std. Deviation | Std. Error of Mean | t     | df | Significant? | Summary | P Value |
|-------------------------|----|-------|----------------|--------------------|-------|----|--------------|---------|---------|
| bioc+ tdTom+ Glf1+ area | 18 | 61.65 | 17.46          | 4.114              | 5.207 | 5  | Yes          | ****    | <0.0001 |
| atypical area           | 18 | 23.86 | 18.34          | 4.324              |       |    |              |         |         |

Figure 6-1

| Figure 6 | panel | animal # | sex | experimental group | time point | total n number | n male/ female | mouse strain       |
|----------|-------|----------|-----|--------------------|------------|----------------|----------------|--------------------|
| a        |       | 1088     | F   | 3x Sham 45 min     | 4 hours    | 4 (Sham)       | 2M/2F          | Aldh111-eGFP/FVB/N |
|          |       | 1089     | F   | 3x Sham 45 min     | 4 hours    |                |                | Aldh111-eGFP/FVB/N |
|          |       | 1743     | M   | 3x Sham 45 min     | 4 hours    |                |                | Aldh111-eGFP/FVB/N |
|          |       | 1094     | M   | 3x Sham 45 min     | 4 hours    |                |                | Aldh111-eGFP/FVB/N |
|          |       | 1740     | M   | 3x TBI 50cm 45 min | 4hpi       | 9 (4hpi)       | 4M/5F          | Aldh111-eGFP/FVB/N |
|          |       | 1092     | M   | 3x TBI 50cm 45 min | 4hpi       |                |                | Aldh111-eGFP/FVB/N |
|          |       | 1093     | M   | 3x TBI 50cm 45 min | 4hpi       |                |                | Aldh111-eGFP/FVB/N |
|          |       | 1094     | M   | 3x TBI 50cm 45 min | 4hpi       |                |                | Aldh111-eGFP/FVB/N |
|          |       | 1085     | F   | 3x TBI 50cm 45 min | 4hpi       |                |                | Aldh111-eGFP/FVB/N |
|          |       | 1086     | F   | 3x TBI 50cm 45 min | 4hpi       |                |                | Aldh111-eGFP/FVB/N |
|          |       | 1742     | F   | 3x TBI 50cm 45 min | 4hpi       |                |                | Aldh111-eGFP/FVB/N |
|          |       | 1739     | F   | 3x TBI 50cm 45 min | 4hpi       |                |                | Aldh111-eGFP/FVB/N |
|          |       | 1741     | F   | 3x TBI 50cm 45 min | 4hpi       |                |                | Aldh111-eGFP/FVB/N |
|          |       | 1647     | F   | 3x Sham 45 min     | 1 day      | 3 (Sham)       | 2M/1F          | Aldh111-eGFP/FVB/N |
|          |       | 1064     | M   | 3x Sham 45 min     | 1 day      |                |                | Aldh111-eGFP/FVB/N |
|          |       | 1063     | M   | 3x Sham 45 min     | 1 day      |                |                | Aldh111-eGFP/FVB/N |
|          |       | 1649     | M   | 3x TBI 50cm 45 min | 1dpi       | 6 (1dpi)       | 3M/3F          | Aldh111-eGFP/FVB/N |
|          |       | 1076     | F   | 3x TBI 50cm 45 min | 1dpi       |                |                | Aldh111-eGFP/FVB/N |
|          |       | 1082     | F   | 3x TBI 50cm 45 min | 1dpi       |                |                | Aldh111-eGFP/FVB/N |
|          |       | 1077     | F   | 3x TBI 50cm 45 min | 1dpi       |                |                | Aldh111-eGFP/FVB/N |
|          |       | 1069     | M   | 3x TBI 50cm 45 min | 1dpi       |                |                | Aldh111-eGFP/FVB/N |
|          |       | 1070     | M   | 3x TBI 50cm 45 min | 1dpi       |                |                | Aldh111-eGFP/FVB/N |
|          |       | 1682     | F   | 3x Sham 45 min     | 3 days     | 1 (Sham)       | 1F             | Aldh111-eGFP/FVB/N |
|          |       | 1653     | M   | 3x TBI 50cm 45 min | 3dpi       | 2 (3dpi)       | 2M             | Aldh111-eGFP/FVB/N |
|          |       | 1655     | M   | 3x TBI 50cm 45 min | 3dpi       |                |                | Aldh111-eGFP/FVB/N |
|          |       | 6038     | F   | 3x Sham 45 min     | 7 days     | 5 (Sham)       | 2M/3F          | Aldh111-eGFP/FVB/N |

|   |      |   |                    |         |           |       |                   |
|---|------|---|--------------------|---------|-----------|-------|-------------------|
|   | 6037 | M | 3x Sham 45 min     | 7 days  |           |       | Aldh11-eGFP/FVB/N |
|   | 6076 | F | 3x Sham 45 min     | 7 days  |           |       | Aldh11-eGFP/FVB/N |
|   | 1747 | F | 3x Sham 45 min     | 7 days  |           |       | Aldh11-eGFP/FVB/N |
|   | 6032 | M | 3x Sham 45 min     | 7 days  |           |       | Aldh11-eGFP/FVB/N |
|   | 1746 | M | 3x TBI 50cm 45 min | 7dpi    | 6 (7dpi)  | 4M/2F | Aldh11-eGFP/FVB/N |
|   | 1749 | M | 3x TBI 50cm 45 min | 7dpi    |           |       | Aldh11-eGFP/FVB/N |
|   | 1748 | F | 3x TBI 50cm 45 min | 7dpi    |           |       | Aldh11-eGFP/FVB/N |
|   | 6034 | M | 3x TBI 50cm 45 min | 7dpi    |           |       | Aldh11-eGFP/FVB/N |
|   | 1745 | F | 3x TBI 50cm 45 min | 7dpi    |           |       | Aldh11-eGFP/FVB/N |
|   | 1744 | M | 3x TBI 50cm 45 min | 7dpi    |           |       | Aldh11-eGFP/FVB/N |
|   | 1738 | F | 3x Sham 45 min     | 28 days | 2 (Sham)  | 2F    | Aldh11-eGFP/FVB/N |
|   | 1754 | F | 3x Sham 45 min     | 28 days |           |       | Aldh11-eGFP/FVB/N |
|   | 1750 | F | 3x TBI 50cm 45 min | 28dpi   | 7 (28dpi) | 4M/3F | Aldh11-eGFP/FVB/N |
|   | 1752 | M | 3x TBI 50cm 45 min | 28dpi   |           |       | Aldh11-eGFP/FVB/N |
|   | 1753 | F | 3x TBI 50cm 45 min | 28dpi   |           |       | Aldh11-eGFP/FVB/N |
|   | 1755 | F | 3x TBI 50cm 45 min | 28dpi   |           |       | Aldh11-eGFP/FVB/N |
|   | 30   | M | 3x TBI 50cm 45 min | 28dpi   |           |       | Aldh11-eGFP/FVB/N |
|   | 35   | M | 3x TBI 50cm 45 min | 28dpi   |           |       | Aldh11-eGFP/FVB/N |
|   | 33   | M | 3x TBI 50cm 45 min | 28dpi   |           |       | Aldh11-eGFP/FVB/N |
|   | 1412 | M | 3x Sham 45 min     | 56 days | 1 (Sham)  | 1M    | Aldh11-eGFP/FVB/N |
|   | 1416 | M | 3x TBI 50cm 45 min | 56dpi   | 3 (56dpi) | 1M/2F | Aldh11-eGFP/FVB/N |
|   | 1443 | F | 3x TBI 50cm 45 min | 56dpi   |           |       | Aldh11-eGFP/FVB/N |
|   | 1442 | F | 3x TBI 50cm 45 min | 56dpi   |           |       | Aldh11-eGFP/FVB/N |
| c | 204  | F | 3x Sham 45 min     | 4 hours | 3 (Sham)  | 3F    | C57/B6            |
|   | 205  | F | 3x Sham 45 min     | 4 hours |           |       | C57/B6            |
|   | 206  | F | 3x Sham 45 min     | 4 hours |           |       | C57/B6            |
|   | 66   | F | 3x TBI 50cm 45 min | 4hpi    | 7 (4hpi)  | 7F    | C57/B6            |
|   | 83   | F | 3x TBI 50cm 45 min | 4hpi    |           |       | C57/B6            |
|   | 72   | F | 3x TBI 50cm 45 min | 4hpi    |           |       | C57/B6            |
|   | 68   | F | 3x TBI 50cm 45 min | 4hpi    |           |       | C57/B6            |
|   | 70   | F | 3x TBI 50cm 45 min | 4hpi    |           |       | C57/B6            |
|   | 763  | F | 3x TBI 50cm 45 min | 4hpi    |           |       | C57/B6            |
|   | 765  | F | 3x TBI 50cm 45 min | 4hpi    |           |       | C57/B6            |
|   | 235  | F | 3x TBI 50cm 45 min | 7dpi    | 6 (7dpi)  | 6F    | C57/B6            |
|   | 236  | F | 3x TBI 50cm 45 min | 7dpi    |           |       | C57/B6            |
|   | 330  | F | 3x TBI 50cm 45 min | 7dpi    |           |       | C57/B6            |
|   | 331  | F | 3x TBI 50cm 45 min | 7dpi    |           |       | C57/B6            |
|   | 1194 | F | 3x TBI 50cm 45 min | 7dpi    |           |       | C57/B6            |
|   | 1192 | F | 3x TBI 50cm 45 min | 7dpi    |           |       | C57/B6            |
| d | 203  | F | 3x Sham 45 min     | 4 hours | 8(Sham)   | 4M/4F | C57/B6            |
|   | 204  | F | 3x Sham 45 min     | 4 hours |           |       | C57/B6            |
|   | 205  | F | 3x Sham 45 min     | 4 hours |           |       | C57/B6            |
|   | 206  | F | 3x Sham 45 min     | 4 hours |           |       | C57/B6            |
|   | 1189 | M | 3x Sham 45 min     | 4 hours |           |       | C57/B6            |
|   | 1030 | M | 3x Sham 45 min     | 4 hours |           |       | C57/B6            |
|   | 1166 | M | 3x Sham 45 min     | 4 hours |           |       | C57/B6            |
|   | 1288 | M | 3x Sham 45 min     | 4 hours |           |       | C57/B6            |
|   | 66   | F | 3x TBI 50cm 45 min | 4hpi    | 11 (4hpi) | 4M/7F | C57/B6            |
|   | 83   | F | 3x TBI 50cm 45 min | 4hpi    |           |       | C57/B6            |
|   | 72   | F | 3x TBI 50cm 45 min | 4hpi    |           |       | C57/B6            |
|   | 68   | F | 3x TBI 50cm 45 min | 4hpi    |           |       | C57/B6            |
|   | 70   | F | 3x TBI 50cm 45 min | 4hpi    |           |       | C57/B6            |
|   | 763  | F | 3x TBI 50cm 45 min | 4hpi    |           |       | C57/B6            |
|   | 765  | F | 3x TBI 50cm 45 min | 4hpi    |           |       | C57/B6            |
|   | 98   | M | 3x TBI 50cm 45 min | 4hpi    |           |       | C57/B6            |
|   | 290  | M | 3x TBI 50cm 45 min | 4hpi    |           |       | C57/B6            |
|   | 291  | M | 3x TBI 50cm 45 min | 4hpi    |           |       | C57/B6            |
|   | 292  | M | 3x TBI 50cm 45 min | 4hpi    |           |       | C57/B6            |
|   | 235  | F | 3x TBI 50cm 45 min | 7dpi    | 15 (7dpi) | 9M/6F | C57/B6            |
|   | 236  | F | 3x TBI 50cm 45 min | 7dpi    |           |       | C57/B6            |
|   | 330  | F | 3x TBI 50cm 45 min | 7dpi    |           |       | C57/B6            |
|   | 331  | F | 3x TBI 50cm 45 min | 7dpi    |           |       | C57/B6            |
|   | 1194 | F | 3x TBI 50cm 45 min | 7dpi    |           |       | C57/B6            |
|   | 1192 | F | 3x TBI 50cm 45 min | 7dpi    |           |       | C57/B6            |
|   | 1275 | M | 3x TBI 50cm 45 min | 7dpi    |           |       | C57/B6            |
|   | 1279 | M | 3x TBI 50cm 45 min | 7dpi    |           |       | C57/B6            |
|   | 329  | M | 3x TBI 50cm 45 min | 7dpi    |           |       | C57/B6            |
|   | 1191 | M | 3x TBI 50cm 45 min | 7dpi    |           |       | C57/B6            |
|   | 1205 | M | 3x TBI 50cm 45 min | 7dpi    |           |       | C57/B6            |
|   | 1284 | M | 3x TBI 50cm 45 min | 7dpi    |           |       | C57/B6            |
|   | 1285 | M | 3x TBI 50cm 45 min | 7dpi    |           |       | C57/B6            |
|   | 1287 | M | 3x TBI 50cm 45 min | 7dpi    |           |       | C57/B6            |
|   | 1190 | M | 3x TBI 50cm 45 min | 7dpi    |           |       | C57/B6            |

Figure 6 - Statistics  
Fig 6d.

Kruskal-Wallis Test, significant difference for post-injury timepoint ( $p=0.0391$ ). N is sample number.

| Dunn's multiple comparisons test | Mean rank diff. | Significant? | Summary | Adjusted P Value |
|----------------------------------|-----------------|--------------|---------|------------------|
| Sham vs. 4hpi                    | -3.5            | No           | ns      | 0.9085           |
| Sham vs. 7dpi                    | -10.62          | Yes          | *       | 0.0359           |

  

| Test details  | Mean 1 | SEM 1 | Mean 2 | SEM 2  |
|---------------|--------|-------|--------|--------|
| Sham vs. 4hpi | 1      | 0.169 | 1.416  | 0.2958 |
| Sham vs. 7dpi | 1      | 0.169 | 2.272  | 0.4318 |

Figure 7-1

| Figure 7 | panel | animal # | sex | experimental group | time point | total n number | n male/<br>female | mouse strain      |
|----------|-------|----------|-----|--------------------|------------|----------------|-------------------|-------------------|
|          | a     | 33       | M   | 3x TBI 50cm 45min  | 28dpi      | 1 (28dpi)      | 1M                | Aldh11-eGFP/FVB/N |
|          | b     | 1739     | F   | 3x TBI 50cm 45min  | 4hpi       | 1 (4hpi)       | 1F                | Aldh11-eGFP/FVB/N |
|          |       | 1648     | F   | 3x TBI 50cm 45min  | 1dpi       | 1 (1dpi)       | 1F                | Aldh11-eGFP/FVB/N |
|          |       | 749      | F   | 3x TBI 50cm 45min  | 3dpi       | 1 (3dpi)       | 1F                | Aldh11-eGFP/FVB/N |
|          |       | 1745     | F   | 3x TBI 50cm 45min  | 7dpi       | 1 (7dpi)       | 1F                | Aldh11-eGFP/FVB/N |
|          |       | 1606     | F   | 3x TBI 50cm 45min  | 14dpi      | 1 (14dpi)      | 1F                | Aldh11-eGFP/FVB/N |
|          |       | 792      | M   | 3x TBI 50cm 45min  | 56dpi      | 1 (56dpi)      | 1M                | Aldh11-eGFP/FVB/N |
|          | c     | 792      | M   | 3x TBI 50cm 45min  | 56dpi      | 1 (56dpi)      | 1M                | Aldh11-eGFP/FVB/N |



|   |      |   |                   |         |           |       |                    |
|---|------|---|-------------------|---------|-----------|-------|--------------------|
| d | 1647 | F | 3x Sham 45min     | 1 day   | 1 (Sham)  | 1F    | Aldh111-eGFP/FVB/N |
|   | 1648 | F | 3x TBI 50cm 45min | 1dpi    | 3 (1dpi)  | 1M/2F | Aldh111-eGFP/FVB/N |
|   | 1649 | M | 3x TBI 50cm 45min | 1dpi    |           |       | Aldh111-eGFP/FVB/N |
|   | 1651 | F | 3x TBI 50cm 45min | 1dpi    |           |       | Aldh111-eGFP/FVB/N |
|   |      |   |                   |         |           |       |                    |
|   | 1682 | F | 3x Sham 45min     | 3 days  | 1 (Sham)  | 1F    | Aldh111-eGFP/FVB/N |
|   | 1653 | M | 3x TBI 50cm 45min | 3dpi    | 4 (3dpi)  | 2M/2F | Aldh111-eGFP/FVB/N |
|   | 1655 | M | 3x TBI 50cm 45min | 3dpi    |           |       | Aldh111-eGFP/FVB/N |
|   | 1686 | F | 3x TBI 50cm 45min | 3dpi    |           |       | Aldh111-eGFP/FVB/N |
|   | 1689 | F | 3x TBI 50cm 45min | 3dpi    |           |       | Aldh111-eGFP/FVB/N |
|   |      |   |                   |         |           |       |                    |
|   | 1747 | F | 3x Sham 45min     | 7 days  | 1 (Sham)  | 1F    | Aldh111-eGFP/FVB/N |
|   | 1744 | M | 3x TBI 50cm 45min | 7dpi    | 5 (7dpi)  | 3M/2F | Aldh111-eGFP/FVB/N |
|   | 1745 | F | 3x TBI 50cm 45min | 7dpi    |           |       | Aldh111-eGFP/FVB/N |
|   | 1746 | M | 3x TBI 50cm 45min | 7dpi    |           |       | Aldh111-eGFP/FVB/N |
|   | 1748 | F | 3x TBI 50cm 45min | 7dpi    |           |       | Aldh111-eGFP/FVB/N |
|   | 1749 | M | 3x TBI 50cm 45min | 7dpi    |           |       | Aldh111-eGFP/FVB/N |
|   |      |   |                   |         |           |       |                    |
|   | 1460 | F | 3x Sham 45min     | 14 days | 2 (Sham)  | 1M/1F | Aldh111-eGFP/FVB/N |
|   | 1607 | M | 3x Sham 45min     | 14 days |           |       | Aldh111-eGFP/FVB/N |
|   | 1454 | F | 3x TBI 50cm 45min | 14dpi   | 4 (14dpi) | 1M/3F | Aldh111-eGFP/FVB/N |
|   | 1463 | F | 3x TBI 50cm 45min | 14dpi   |           |       | Aldh111-eGFP/FVB/N |
|   | 1606 | F | 3x TBI 50cm 45min | 14dpi   |           |       | Aldh111-eGFP/FVB/N |
|   | 1608 | M | 3x TBI 50cm 45min | 14dpi   |           |       | Aldh111-eGFP/FVB/N |
|   |      |   |                   |         |           |       |                    |
|   | 1754 | F | 3x Sham 45min     | 28 days | 2 (Sham)  | 2F    | Aldh111-eGFP/FVB/N |
|   | 1738 | F | 3x Sham 45min     | 28 days |           |       | Aldh111-eGFP/FVB/N |
|   | 1750 | F | 3x TBI 50cm 45min | 28dpi   | 4 (28dpi) | 1M/3F | Aldh111-eGFP/FVB/N |
|   | 1752 | M | 3x TBI 50cm 45min | 28dpi   |           |       | Aldh111-eGFP/FVB/N |
|   | 1753 | F | 3x TBI 50cm 45min | 28dpi   |           |       | Aldh111-eGFP/FVB/N |
|   | 1755 | F | 3x TBI 50cm 45min | 28dpi   |           |       | Aldh111-eGFP/FVB/N |

Figure 7 - Statistics

Fig. 7c Kruskal-Wallis Test, no significant difference for post-injury timepoint ( $p=0.6998$ ), N is sample number

| Dunn's multiple comparisons test | Mean rank diff. | Significant? | Summary | Adjusted P Value |
|----------------------------------|-----------------|--------------|---------|------------------|
| 1dpi vs. 3dpi                    | 0.8712          | No           | ns      | >0.9999          |
| 1dpi vs. 7dpi                    | 6.417           | No           | ns      | >0.9999          |
| 1dpi vs. 14dpi                   | -4.383          | No           | ns      | >0.9999          |
| 1dpi vs. 28dpi                   | 0.8611          | No           | ns      | >0.9999          |
| 3dpi vs. 7dpi                    | 5.545           | No           | ns      | >0.9999          |
| 3dpi vs. 14dpi                   | -5.255          | No           | ns      | >0.9999          |
| 3dpi vs. 28dpi                   | -0.0101         | No           | ns      | >0.9999          |
| 7dpi vs. 14dpi                   | -10.8           | No           | ns      | >0.9999          |
| 7dpi vs. 28dpi                   | -5.556          | No           | ns      | >0.9999          |
| 14dpi vs. 28dpi                  | 5.244           | No           | ns      | >0.9999          |

| Test details    | Mean 1 | SEM 1  | Mean 2 | SEM 2  | N1 | N2 |
|-----------------|--------|--------|--------|--------|----|----|
| 1dpi vs. 3dpi   | 1.29   | 0.1317 | 1.334  | 0.1523 | 12 | 11 |
| 1dpi vs. 7dpi   | 1.29   | 0.1317 | 1.366  | 0.4111 | 12 | 7  |
| 1dpi vs. 14dpi  | 1.29   | 0.1317 | 1.521  | 0.1972 | 12 | 5  |
| 1dpi vs. 28dpi  | 1.29   | 0.1317 | 1.255  | 0.193  | 12 | 9  |
| 3dpi vs. 7dpi   | 1.334  | 0.1523 | 1.366  | 0.4111 | 11 | 7  |
| 3dpi vs. 14dpi  | 1.334  | 0.1523 | 1.521  | 0.1972 | 11 | 5  |
| 3dpi vs. 28dpi  | 1.334  | 0.1523 | 1.255  | 0.193  | 11 | 9  |
| 7dpi vs. 14dpi  | 1.366  | 0.4111 | 1.521  | 0.1972 | 7  | 5  |
| 7dpi vs. 28dpi  | 1.366  | 0.4111 | 1.255  | 0.193  | 7  | 9  |
| 14dpi vs. 28dpi | 1.521  | 0.1972 | 1.255  | 0.193  | 5  | 9  |

Figure 8-1

| Figure 8 | panel | animal # | sex | experimental group      | time point | total n number | n male/female | mouse strain |
|----------|-------|----------|-----|-------------------------|------------|----------------|---------------|--------------|
|          | a     | 123      | M   | 3x TBI 50cm 45min + EEG | 50dpi      | 9 (rdTBI)      | 9M            | C57BL/6      |
|          |       | 127      | M   | 3x TBI 50cm 45min + EEG | 50dpi      |                |               | C57BL/6      |
|          |       | 129      | M   | 3x TBI 50cm 45min + EEG | 50dpi      |                |               | C57BL/6      |
|          |       | 1106     | M   | 3x TBI 50cm 45min + EEG | 78dpi      |                |               | C57BL/6      |
|          |       | 1105     | M   | 3x TBI 50cm 45min + EEG | 78dpi      |                |               | C57BL/6      |
|          |       | 1107     | M   | 3x TBI 50cm 45min + EEG | 78dpi      |                |               | C57BL/6      |
|          |       | 1108     | M   | 3x TBI 50cm 45min + EEG | 78dpi      |                |               | C57BL/6      |
|          |       | 1336     | M   | 3x TBI 50cm 45min + EEG | 110dpi     |                |               | C57BL/6      |
|          |       | 1822     | M   | 3x TBI 50cm 45min + EEG | 110dpi     |                |               | C57BL/6      |
|          | b,c   | 7779     | M   | 3xSham+EEG              | 50 days    | 1 (Sham)       | 1M            | C57BL/6      |
|          |       | 129      | M   | 3x TBI 50cm 45min + EEG | 35dpi      | 1 (rdTBI)      | 1M            | C57BL/6      |
|          | d     | 1106     | M   | 3x TBI 50cm 45min + EEG | 78dpi      | 1 (rdTBI)      | 1M            | C57BL/6      |
|          | e     | 7779     | M   | 3xSham+EEG              | 50 days    | 1 (Sham)       | 1M            | C57BL/6      |
|          |       | 129      | M   | 3x TBI 50cm 45min + EEG | 35dpi      | 2 (rdTBI)      | 2M            | C57BL/6      |
|          |       | 1106     | M   | 3x TBI 50cm 45min + EEG | 78dpi      |                |               | C57BL/6      |
|          | f     | 7776     | M   | 3xSham+EEG              | 50 days    | 6 (Sham)       | 6M            | C57BL/6      |
|          |       | 7779     | M   | 3xSham+EEG              | 50 days    |                |               | C57BL/6      |
|          |       | 6213     | M   | 3xSham+EEG              | 76 days    |                |               | C57BL/6      |
|          |       | 6221     | M   | 3xSham+EEG              | 75 days    |                |               | C57BL/6      |
|          |       | 6232     | M   | 3xSham+EEG              | 74 days    |                |               | C57BL/6      |
|          |       | 6234     | M   | 3xSham+EEG              | 45 days    |                |               | C57BL/6      |
|          |       | 123      | M   | 3x TBI 50cm 45min + EEG | 50dpi      | 9 (rdTBI)      | 9M            | C57BL/6      |

|   |      |   |                         |         |           |    |         |
|---|------|---|-------------------------|---------|-----------|----|---------|
|   | 127  | M | 3x TBI 50cm 45min + EEG | 50dpi   |           |    | C57BL/6 |
|   | 129  | M | 3x TBI 50cm 45min + EEG | 50dpi   |           |    | C57BL/6 |
|   | 1106 | M | 3x TBI 50cm 45min + EEG | 78dpi   |           |    | C57BL/6 |
|   | 1105 | M | 3x TBI 50cm 45min + EEG | 78dpi   |           |    | C57BL/6 |
|   | 1107 | M | 3x TBI 50cm 45min + EEG | 78dpi   |           |    | C57BL/6 |
|   | 1108 | M | 3x TBI 50cm 45min + EEG | 78dpi   |           |    | C57BL/6 |
|   | 1336 | M | 3x TBI 50cm 45min + EEG | 110dpi  |           |    | C57BL/6 |
|   | 1822 | M | 3x TBI 50cm 45min + EEG | 110dpi  |           |    | C57BL/6 |
|   |      |   |                         |         |           |    |         |
| g | 7779 | M | 3xSham+EEG              | 50 days | 1 (Sham)  | 1M | C57BL/6 |
|   | 129  | M | 3x TBI 50cm 45min + EEG | 50dpi   | 1 (rdTBI) | 1M | C57BL/6 |
|   |      |   |                         |         |           |    |         |
| h | 127  | M | 3x TBI 50cm 45min + EEG | 50dpi   | 1 (rdTBI) | 1M | C57BL/6 |

|  | animal # | sex | experimental group | time point | total n number         | n male/<br>female | mouse strain |
|--|----------|-----|--------------------|------------|------------------------|-------------------|--------------|
|  | 123      | M   | 3x TBI, PTE        | 50 dpi     | 4 (3x TBI, Seizures+)  | 4M                | C57BL/6      |
|  | 127      | M   | 3x TBI, PTE        | 50 dpi     |                        |                   | C57BL/6      |
|  | 129      | M   | 3x TBI, PTE        | 50 dpi     |                        |                   | C57BL/6      |
|  | 1106     | M   | 3x TBI, PTE        | 78 dpi     |                        |                   | C57BL/6      |
|  | 1105     | M   | 3x TBI, no PTE     | 78 dpi     | 5 (3x TBI, Sseizures-) | 5M                | C57BL/6      |
|  | 1107     | M   | 3x TBI, no PTE     | 78 dpi     |                        |                   | C57BL/6      |
|  | 1108     | M   | 3x TBI, no PTE     | 78 dpi     |                        |                   | C57BL/6      |
|  | 1822     | M   | 3x TBI, no PTE     | 107 dpi    |                        |                   | C57BL/6      |
|  | 1336     | M   | 3x TBI, no PTE     | 63 dpi     |                        |                   | C57BL/6      |

**Figure 8 Statistics**

Fig.8f One-way ANOVA, significant difference (p=0.0042) N is sample number.

| Holm-Sidak's multiple comparisons test | Mean Diff. | Significant? | Summary | Adjusted P Value |
|----------------------------------------|------------|--------------|---------|------------------|
| 3xSham vs. 3xTBI, Seizure-             | 0          | No           | ns      | >0.9999          |
| 3xSham vs. 3xTBI, Seizure+             | -0.3005    | Yes          | **      | 0.0073           |
| 3xTBI, Seizure- vs. 3xTBI, Seizure+    | -0.3005    | Yes          | **      | 0.0073           |

| Test details                        | Mean 1 | Mean 2 | Mean Diff. | SE of diff. | N1 | N2 |
|-------------------------------------|--------|--------|------------|-------------|----|----|
| 3xSham vs. 3xTBI, Seizure-          | 0      | 0      | 0          | 0.07371     | 6  | 5  |
| 3xSham vs. 3xTBI, Seizure+          | 0      | 0.3005 | -0.3005    | 0.07858     | 6  | 4  |
| 3xTBI, Seizure- vs. 3xTBI, Seizure+ | 0      | 0.3005 | -0.3005    | 0.08166     | 5  | 4  |

Fig.8i Unpaired t-test, significant difference between rdTBI, no seizures and rdTBI seizures (p=0.0432). N is sample number.

|                    | N | Mean  | Std. Deviation | Std. Error of Mean | t     | df | Significant? | Summary | P Value |
|--------------------|---|-------|----------------|--------------------|-------|----|--------------|---------|---------|
| rdTBI, no seizures | 4 | 3.21  | 0.9208         | 0.4604             | 2.556 | 6  | Yes          | *       | 0.0432  |
| rdTBI, seizures    | 4 | 5.871 | 1.867          | 0.9337             |       |    |              |         |         |
